# Supplementary material for: ANGPTL4 negatively regulates the progression of osteosarcoma by remodeling branched-chain amino acid metabolism
Source: PubMed Central journal article supplement (PMC9035178; doi:10.1038/s41420-022-01029-x), 2022-04-23
Supplement: 41420_2022_1029_MOESM7_ESM.pdf [file 41420_2022_1029_MOESM7_ESM.pdf]

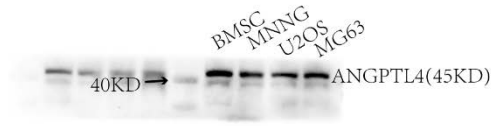

ANGPTL4\_Fig.1

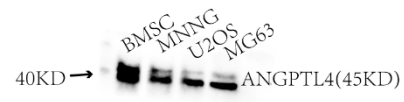

ANGPTL4\_Fig.1\_1

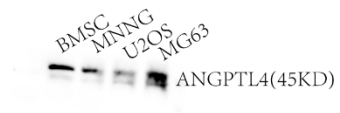

ANGPTL4\_Fig.1\_2

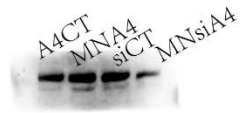

ANGPTL4\_Fig.2

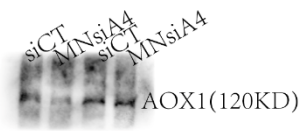

AOX1\_5 $\mu$ m

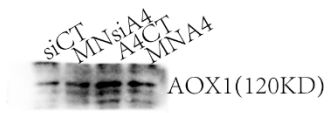

AOX1\_a4 & si4

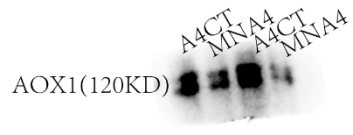

AOX1\_a4

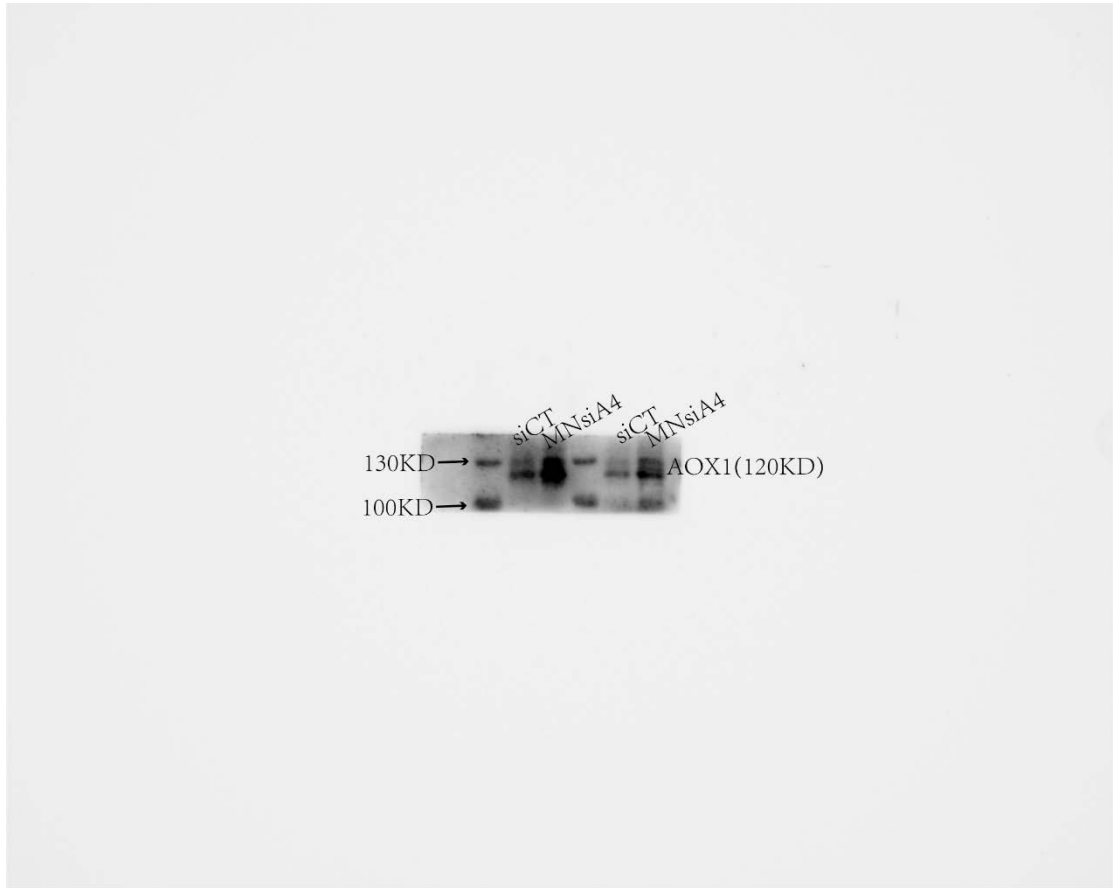

AOX1\_sia4



siCT  
MNA4  
siA4  
CT  
MNA4



BCKDHA(50KD)

A4 & siA4

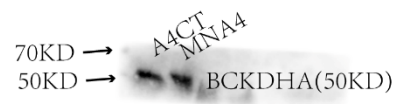

BCKDHA\_A4

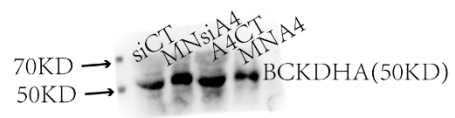

BCKDHA\_sia4 & a4

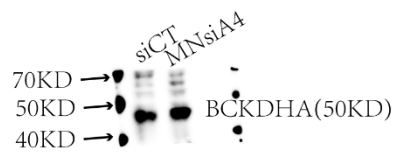

BCKDHA\_sia4

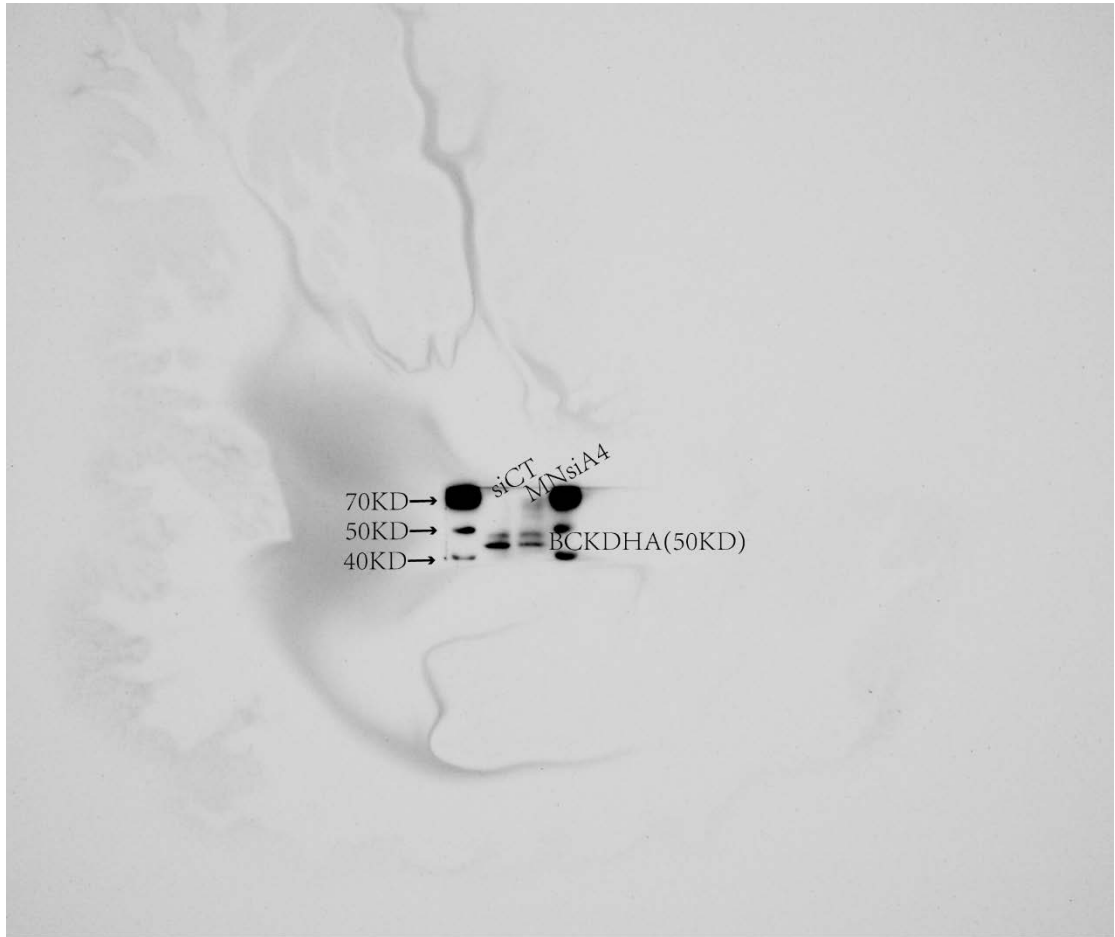

BCKDHA\_sia4\_5 $\mu$ m

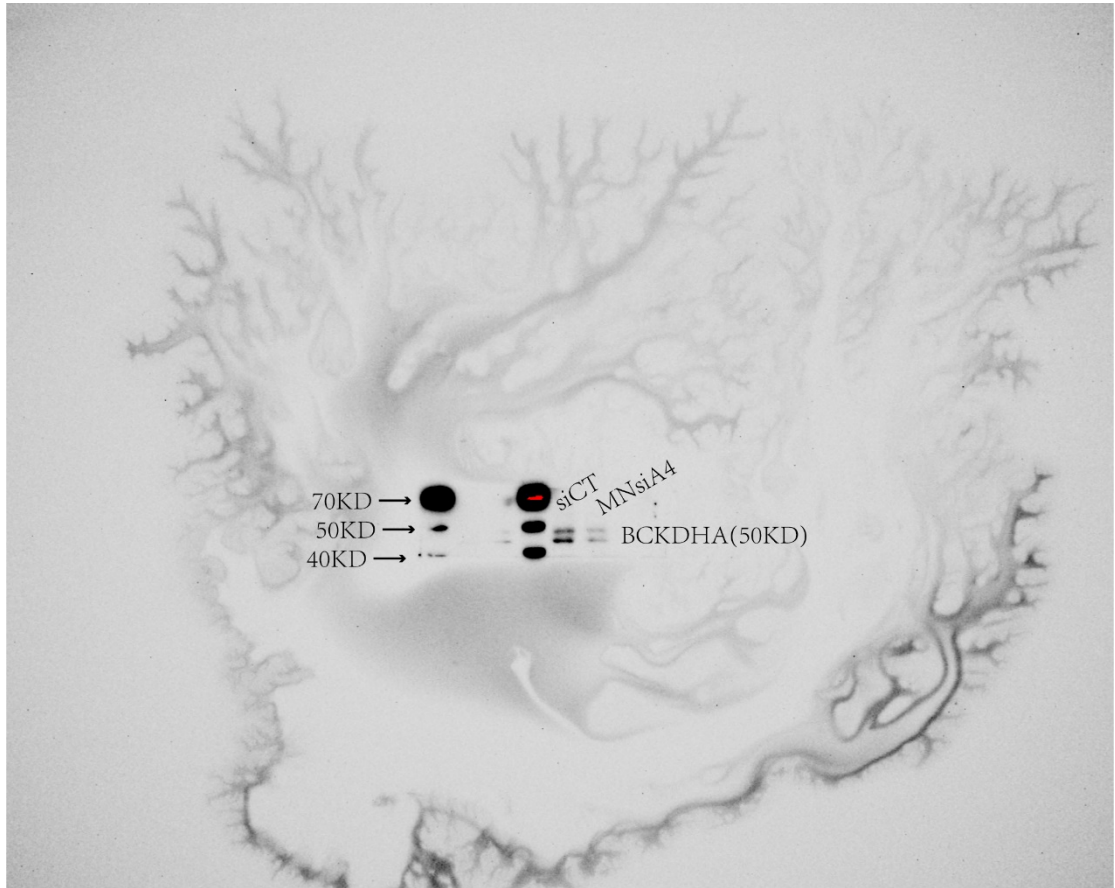

BCKDHA\_sia4\_5µm\_1

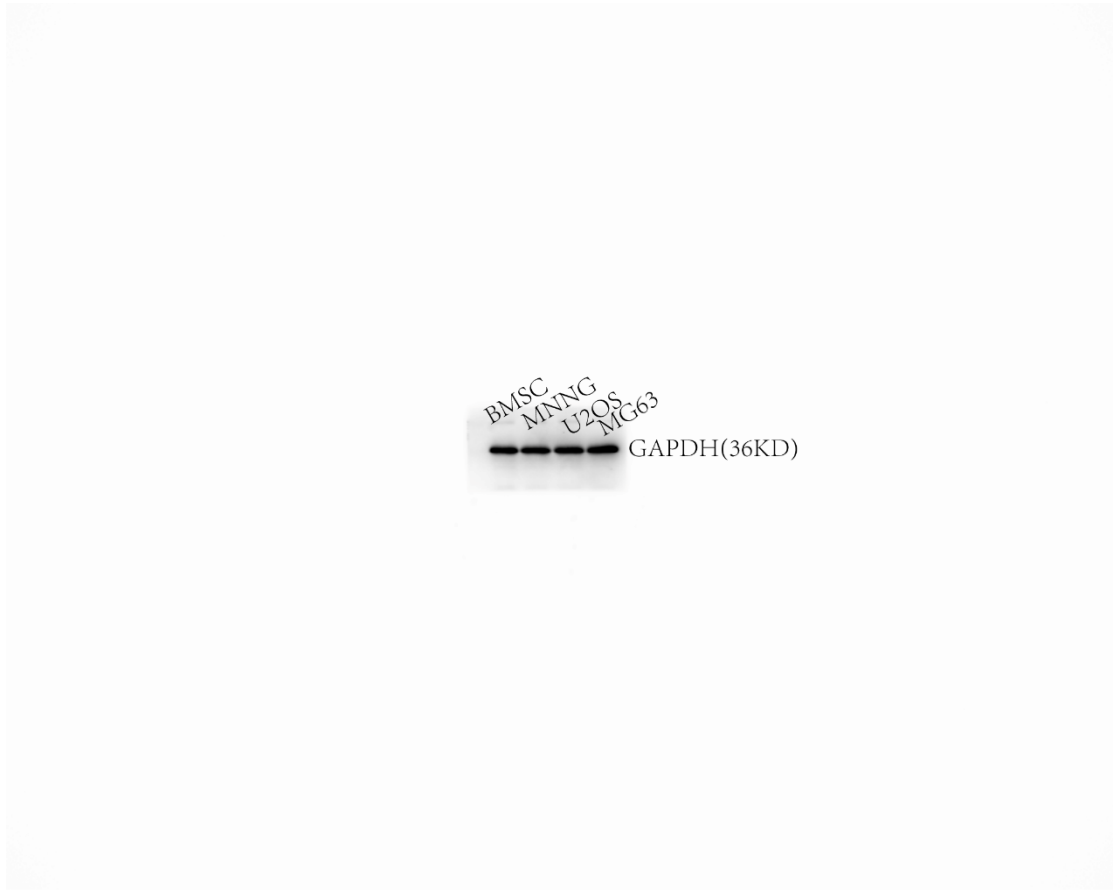

GAPDH\_Fig.1

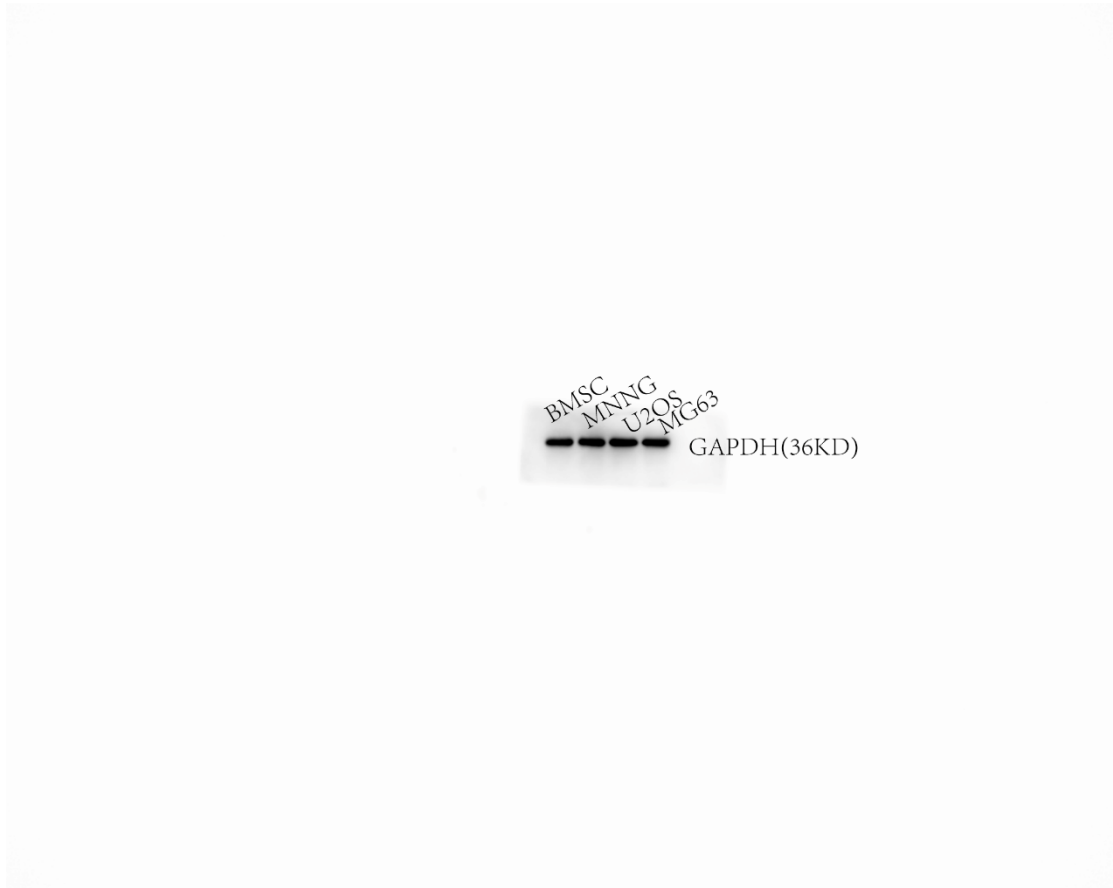

GAPDH\_Fig.1\_1



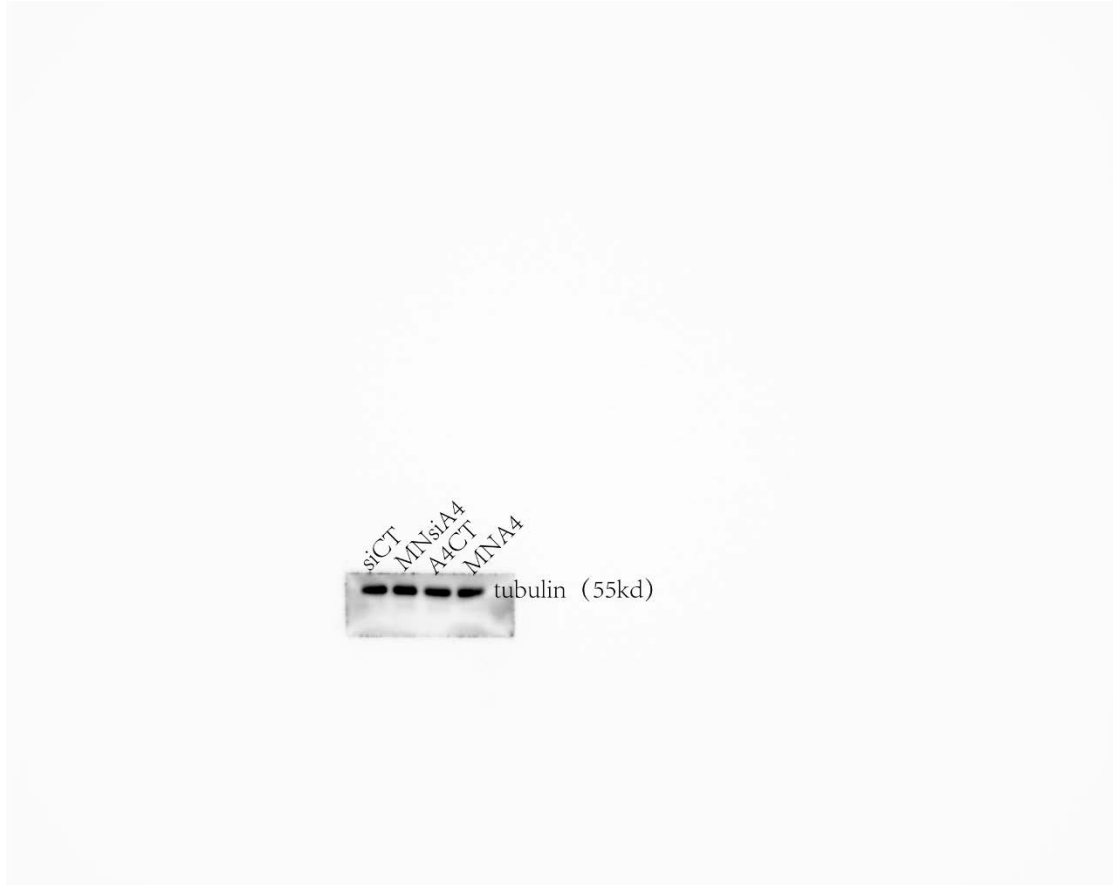

tubulin\_Fig.4\_1

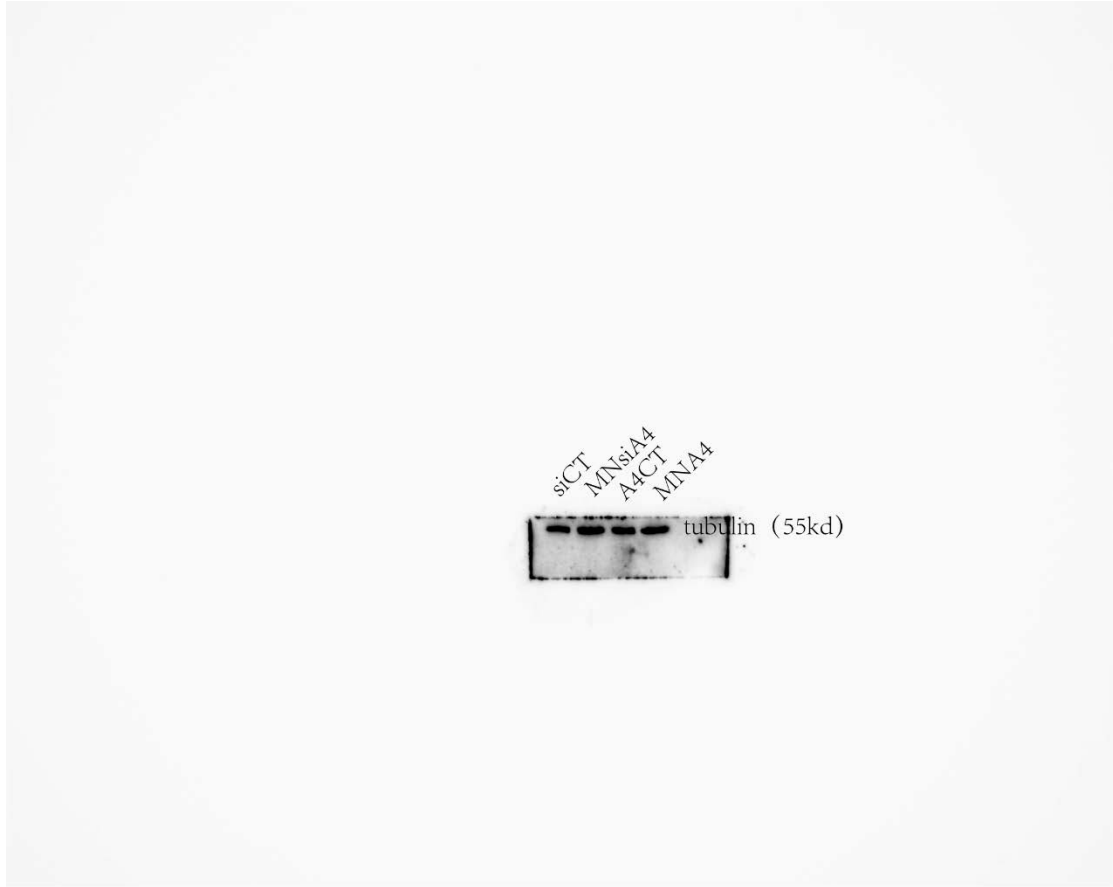

tubulin\_Fig.4\_2

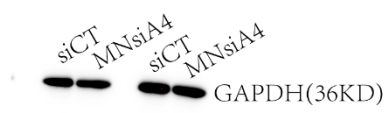

GAPDH\_Fig.5

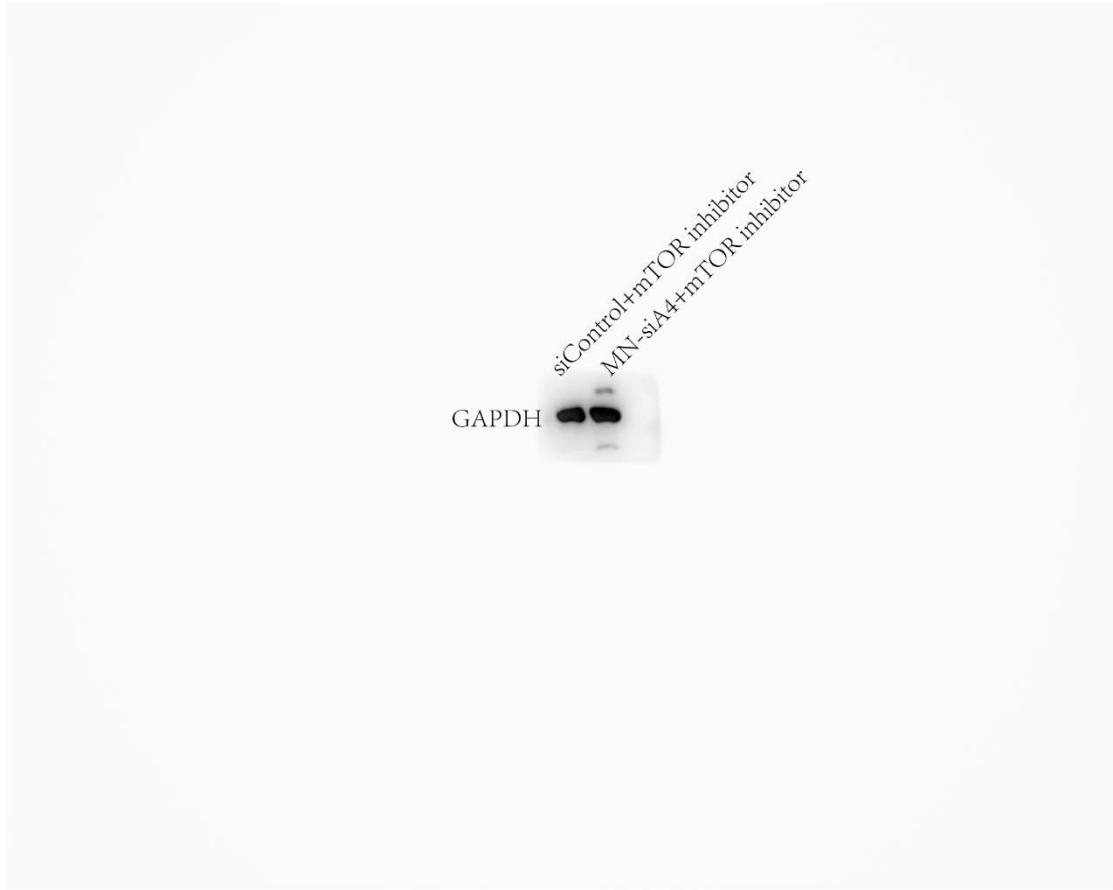

GAPDH\_Fig.6

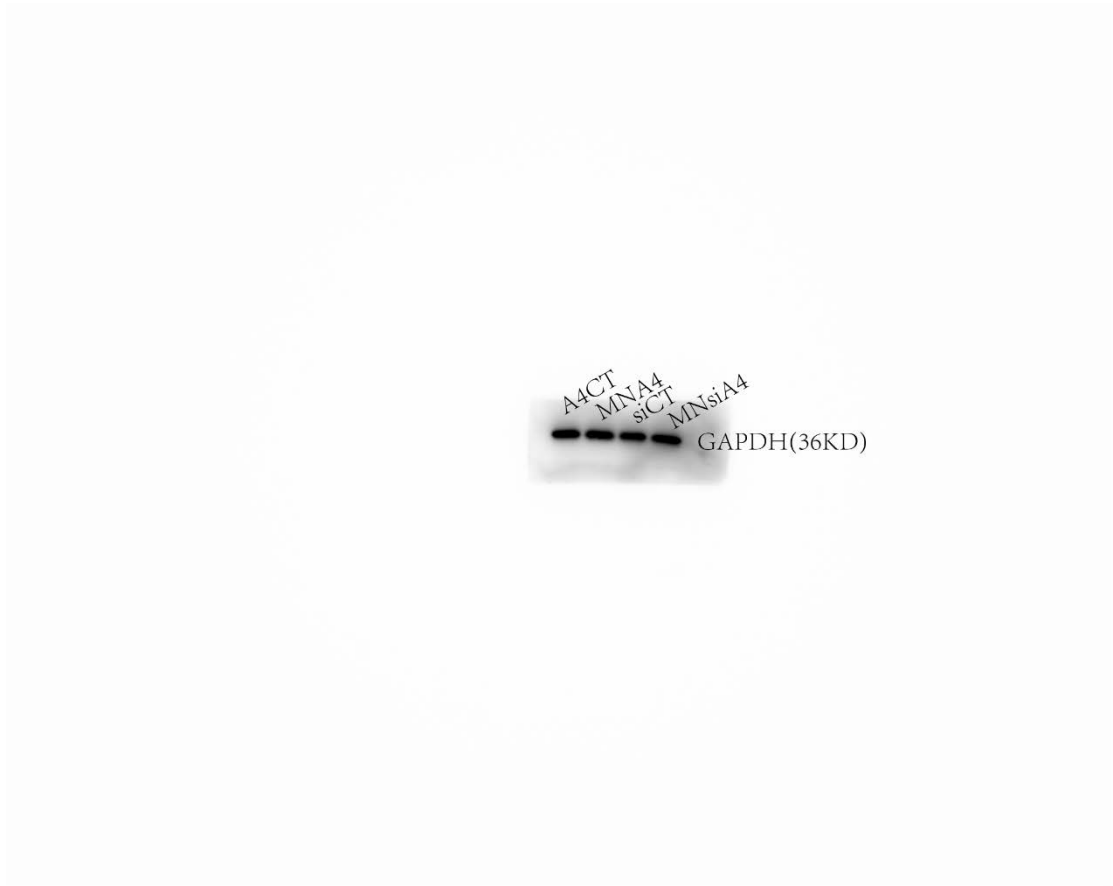

GAPDH\_Fig.2

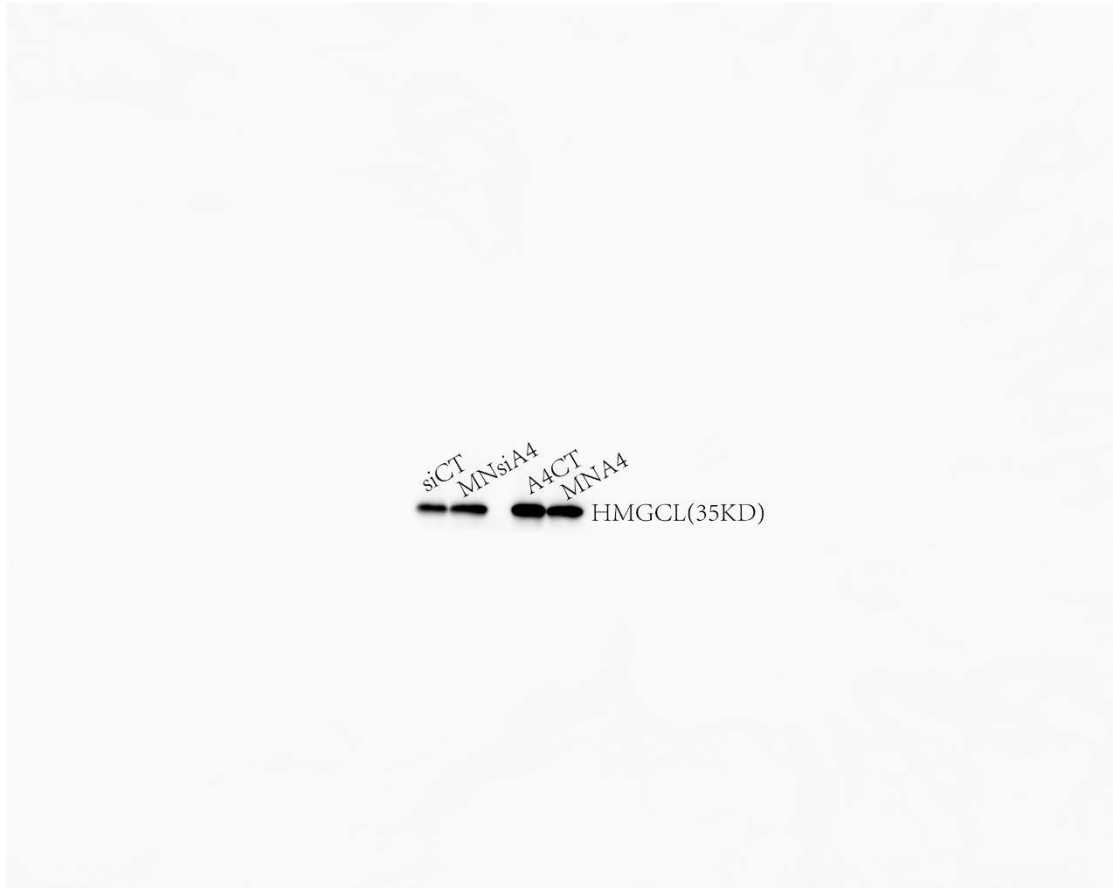

HMGCL\_a4 & sia4

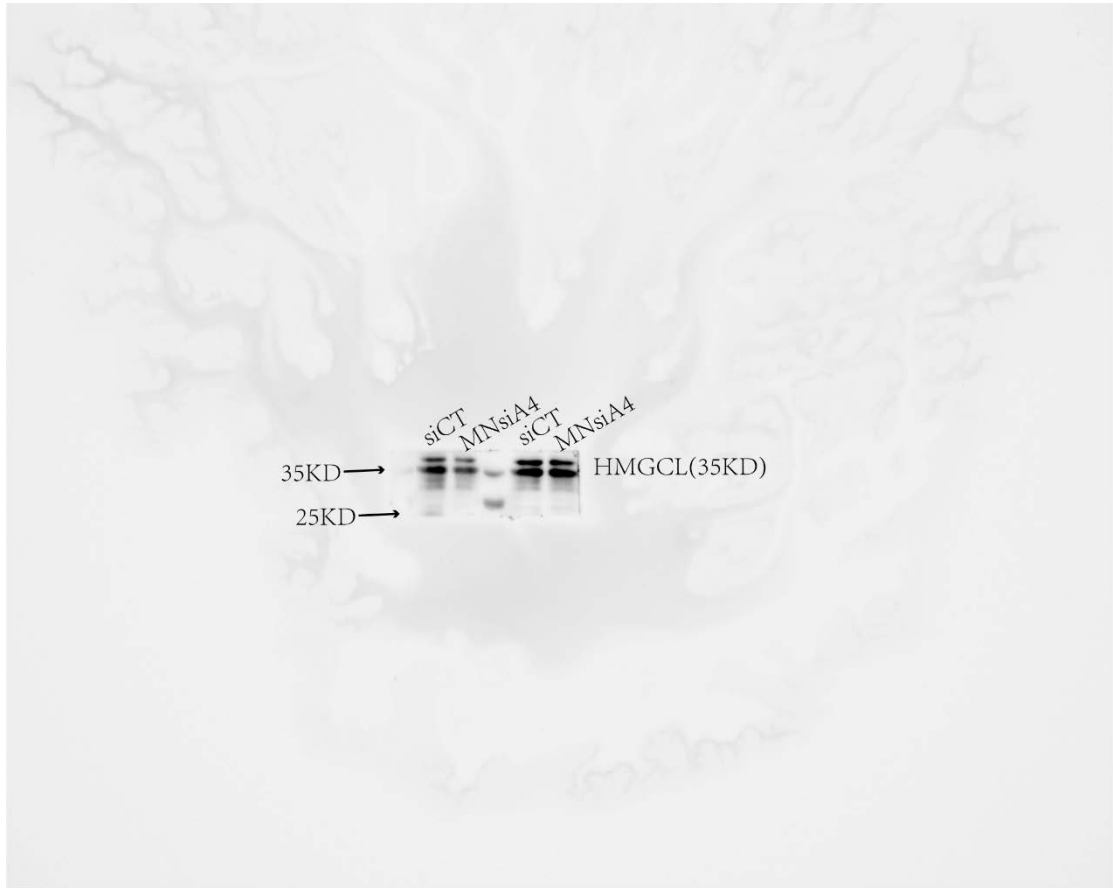

HMGCL\_5µm

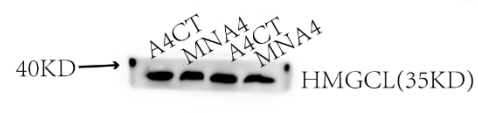

HMGCL\_a4



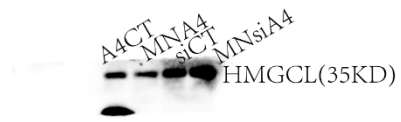

HMGCL\_sia4

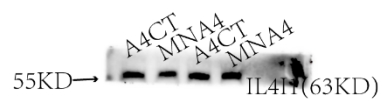

IL4I1\_a4

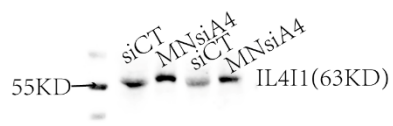

IL4I1\_ sia4

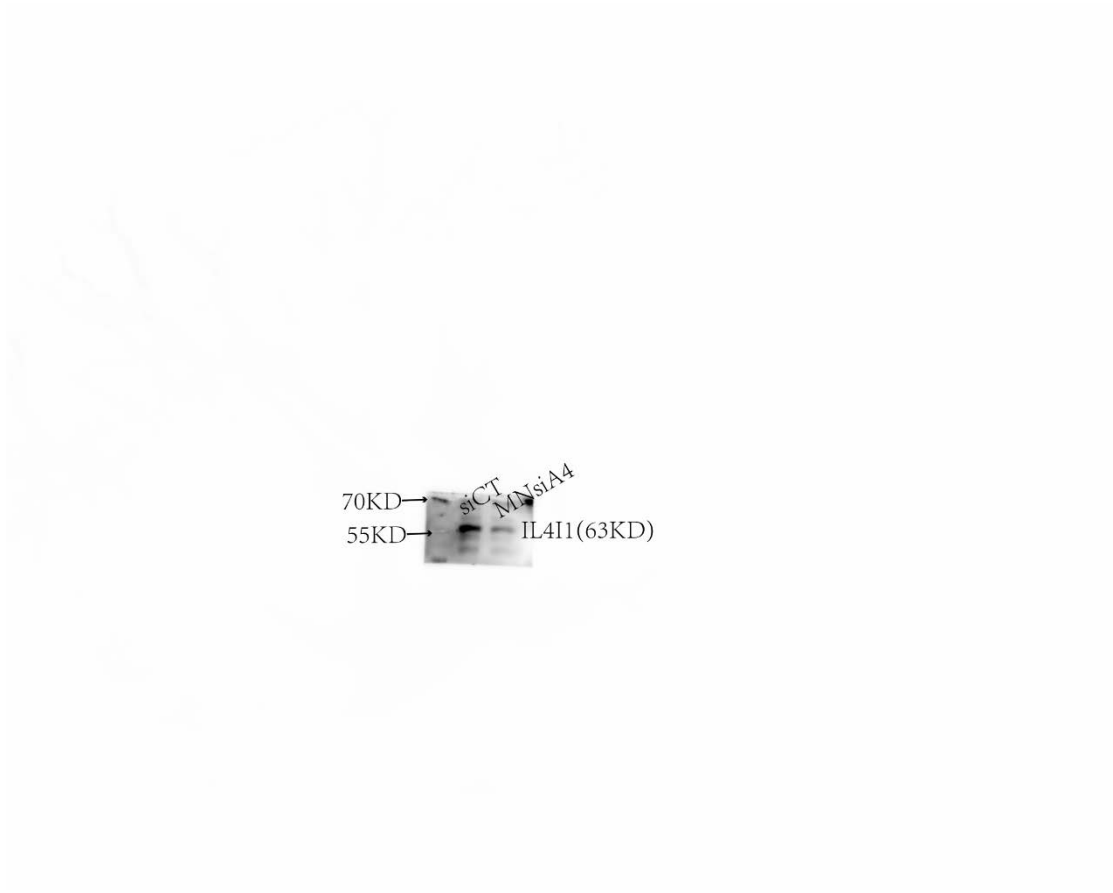

IL4I1\_5 $\mu$ m

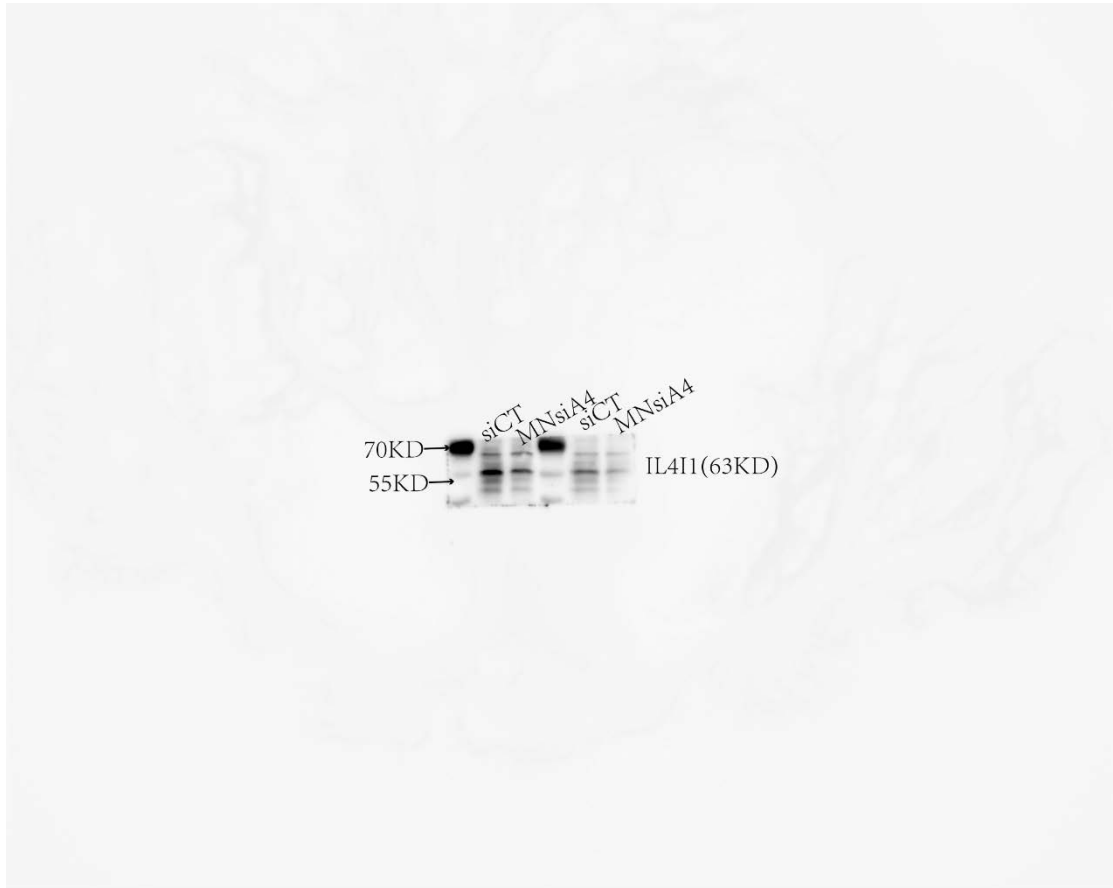

IL4I1\_5 $\mu$ m\_1

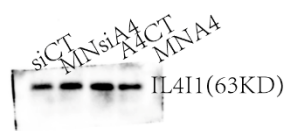

IL4I1 a4 & sia4

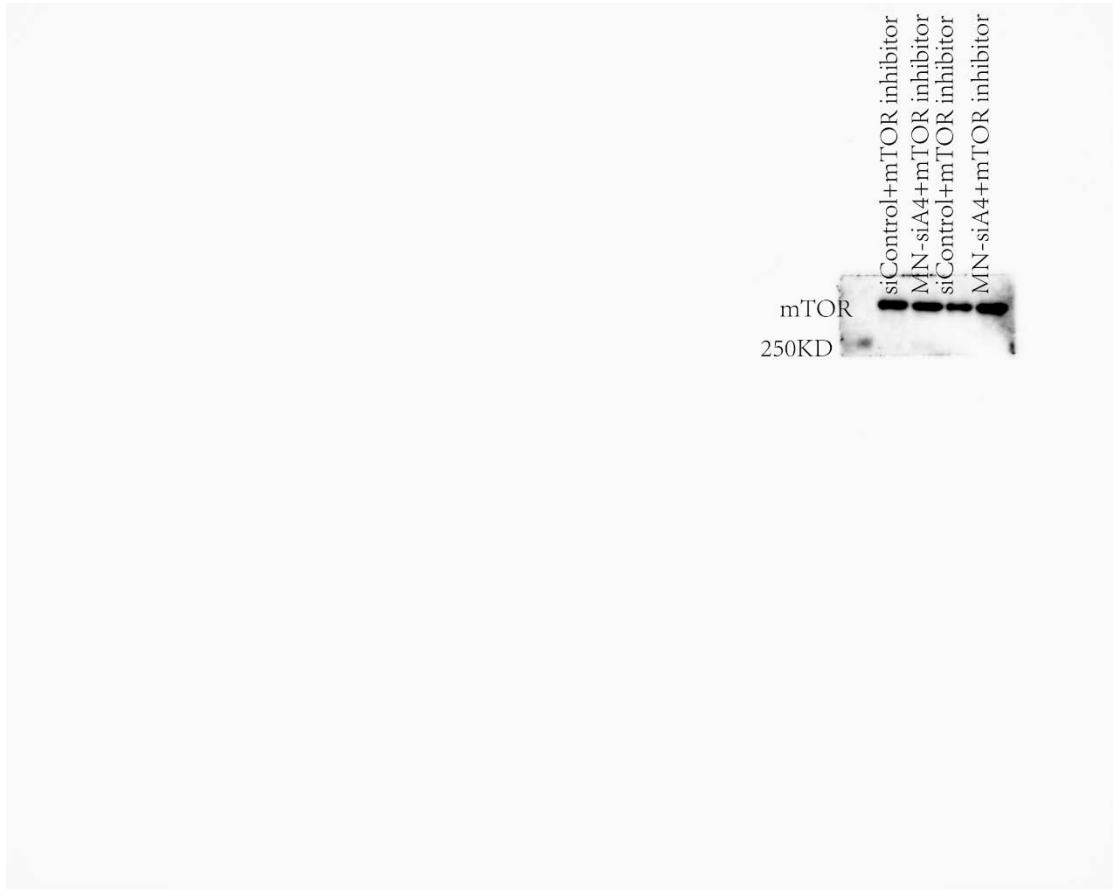

mTOR for Fig.6

A4CT  
MNA4  
mTOR(289KD)

mTOR\_A4



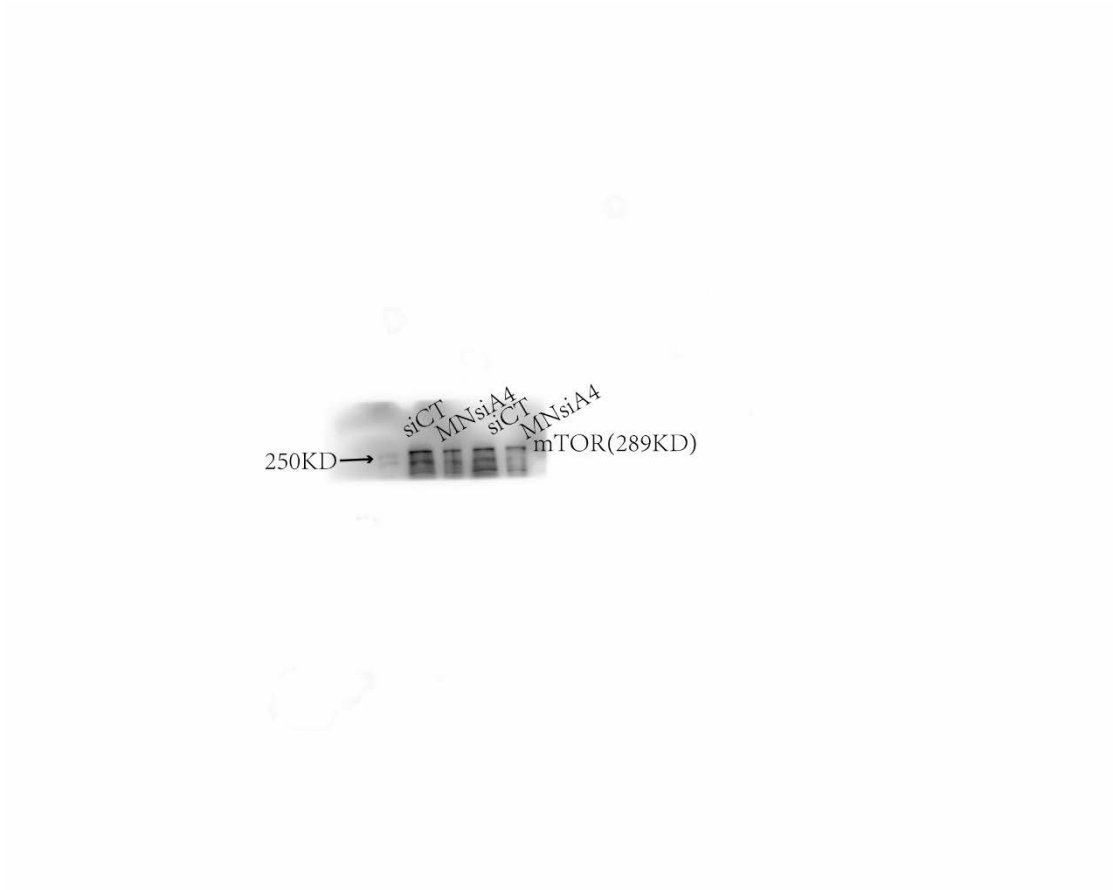

mTOR\_sia4

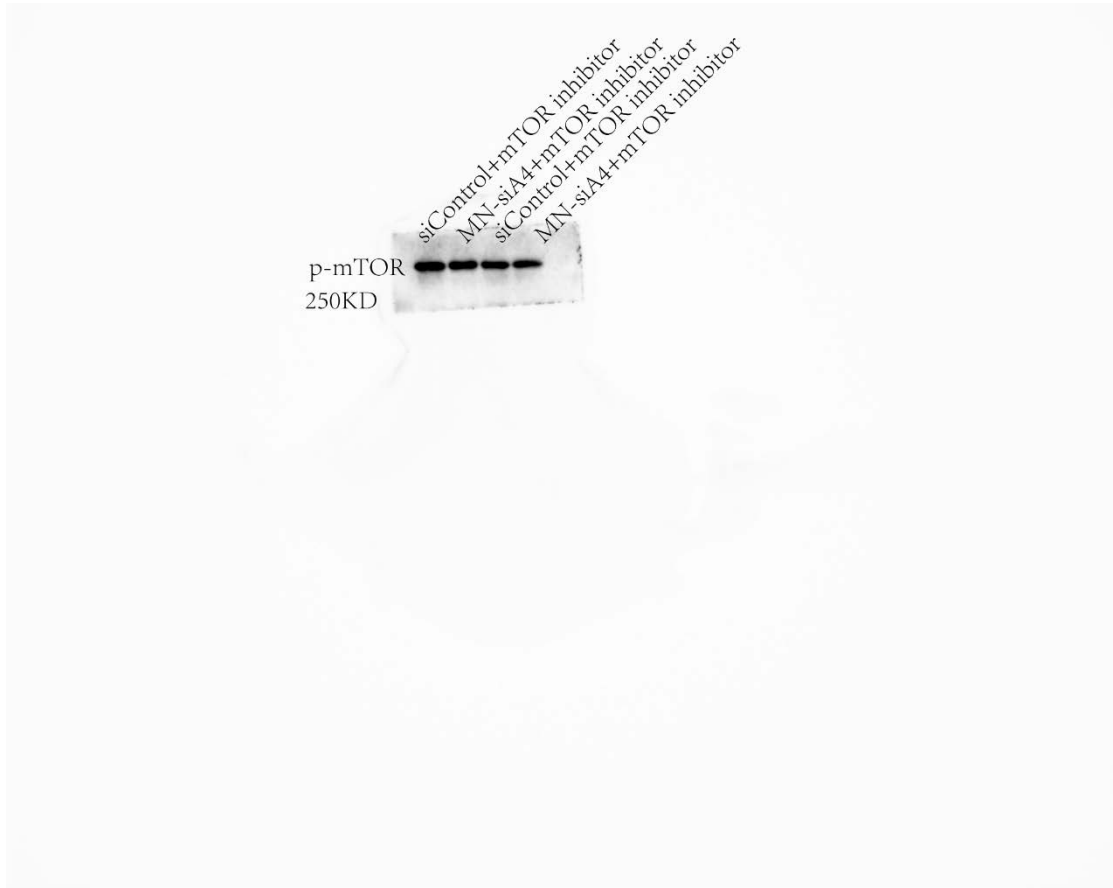

p-mTOR for Fig.6

siCT MNsiA4 A4CT MNA4  
mTOR(289KD)

p-mTOR

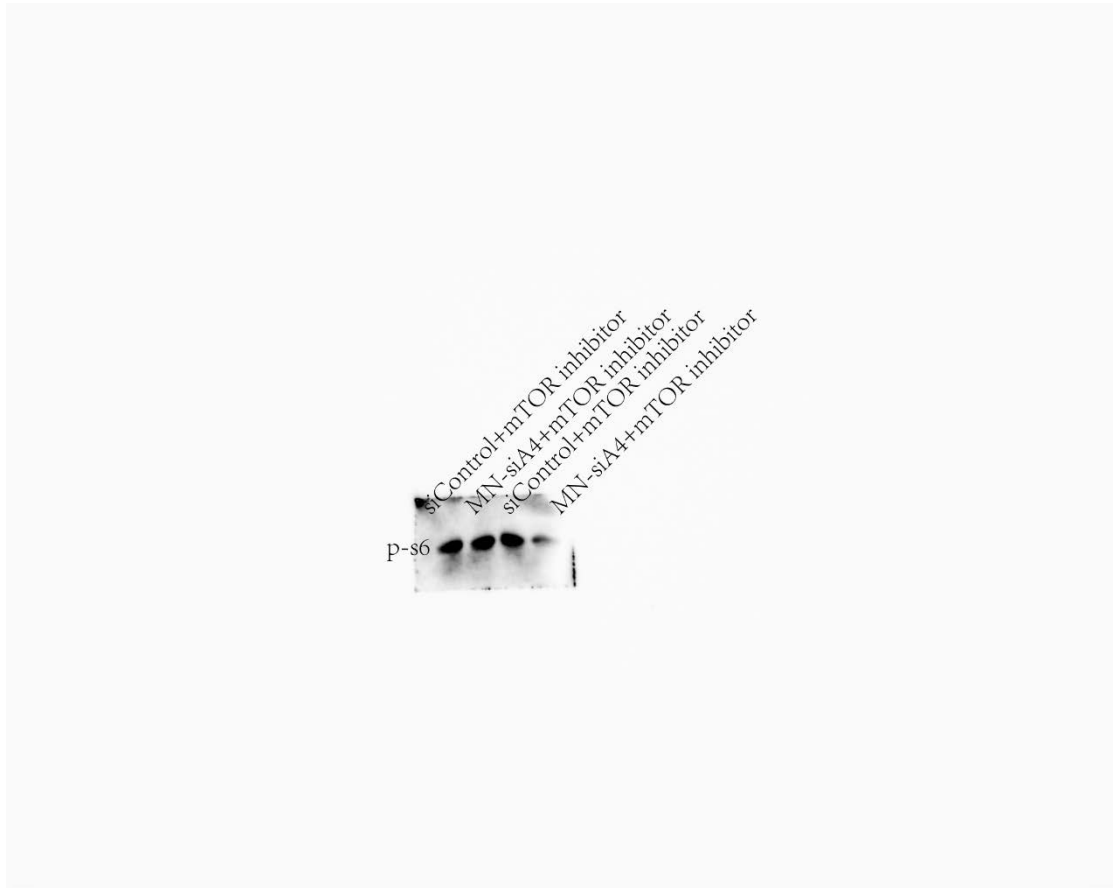

p-s6 for Fig.6

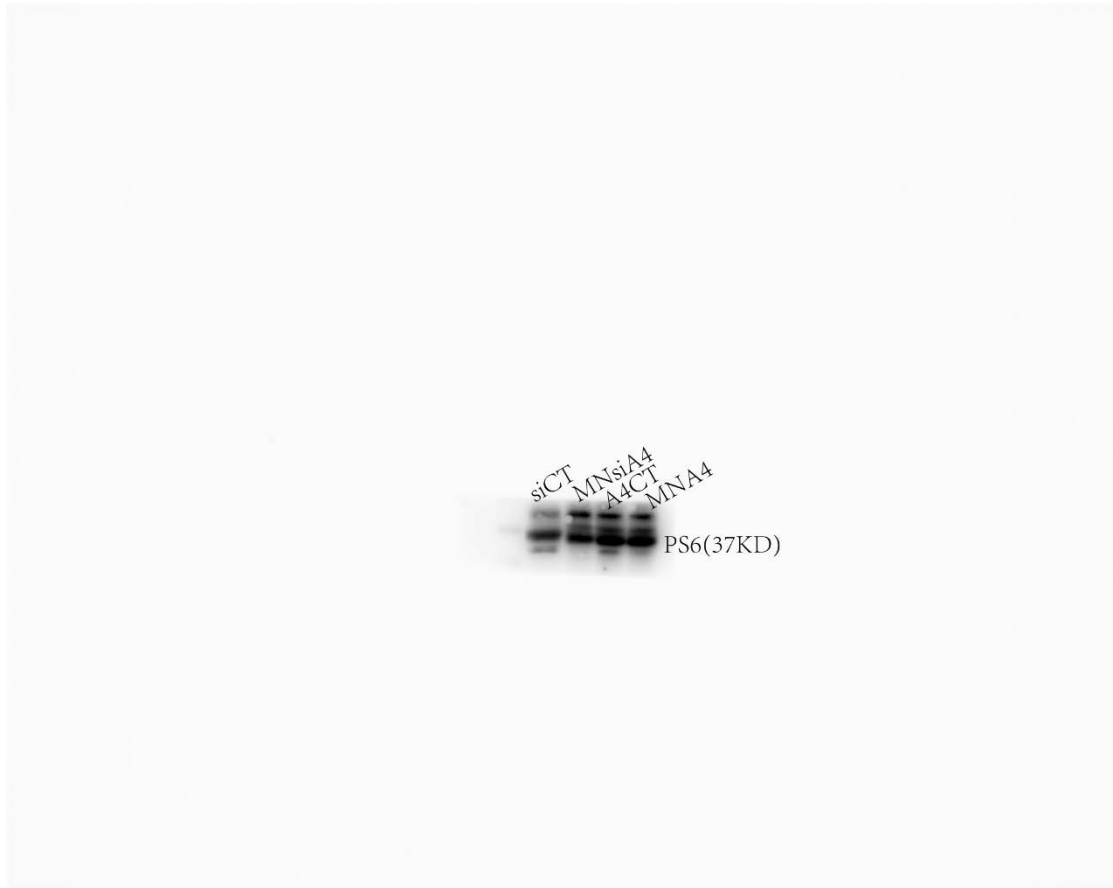

p-s6\_a4 and sia4

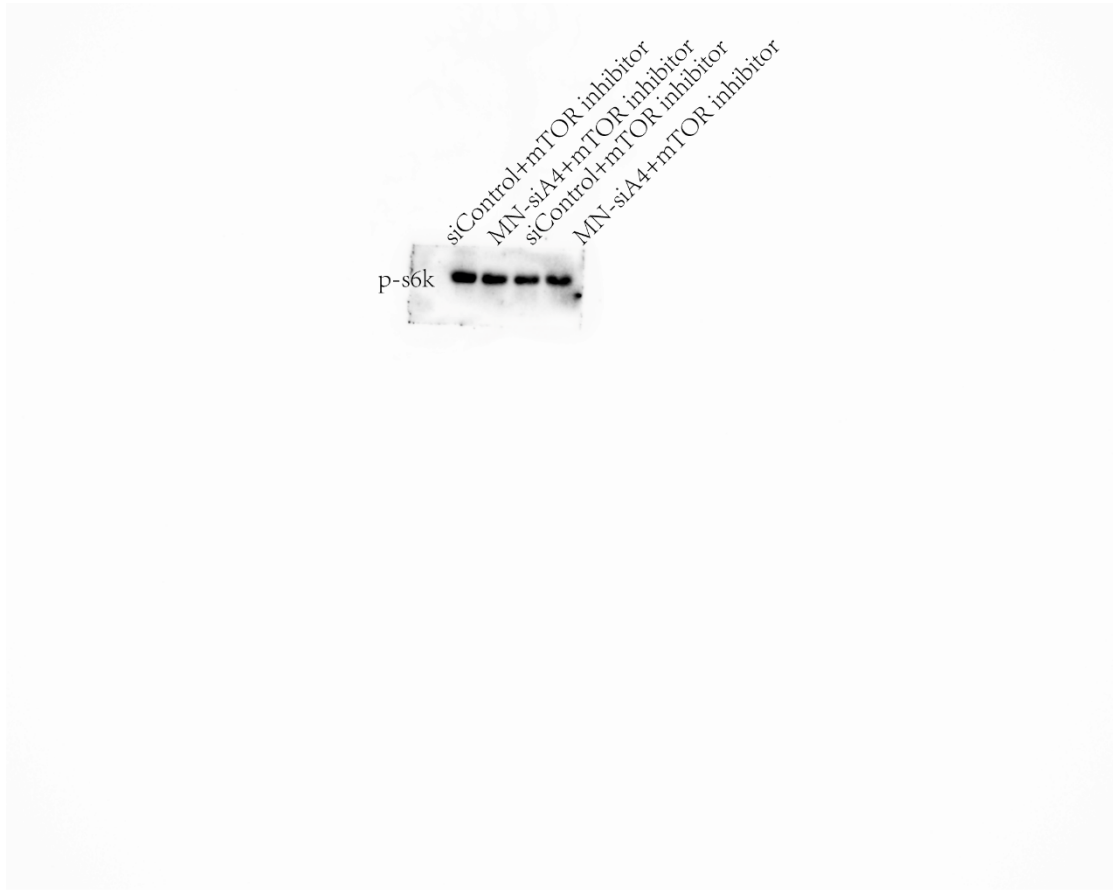

p-s6k for Fig.6

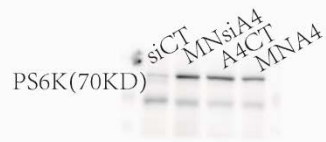

p-s6k\_a4 and sia4

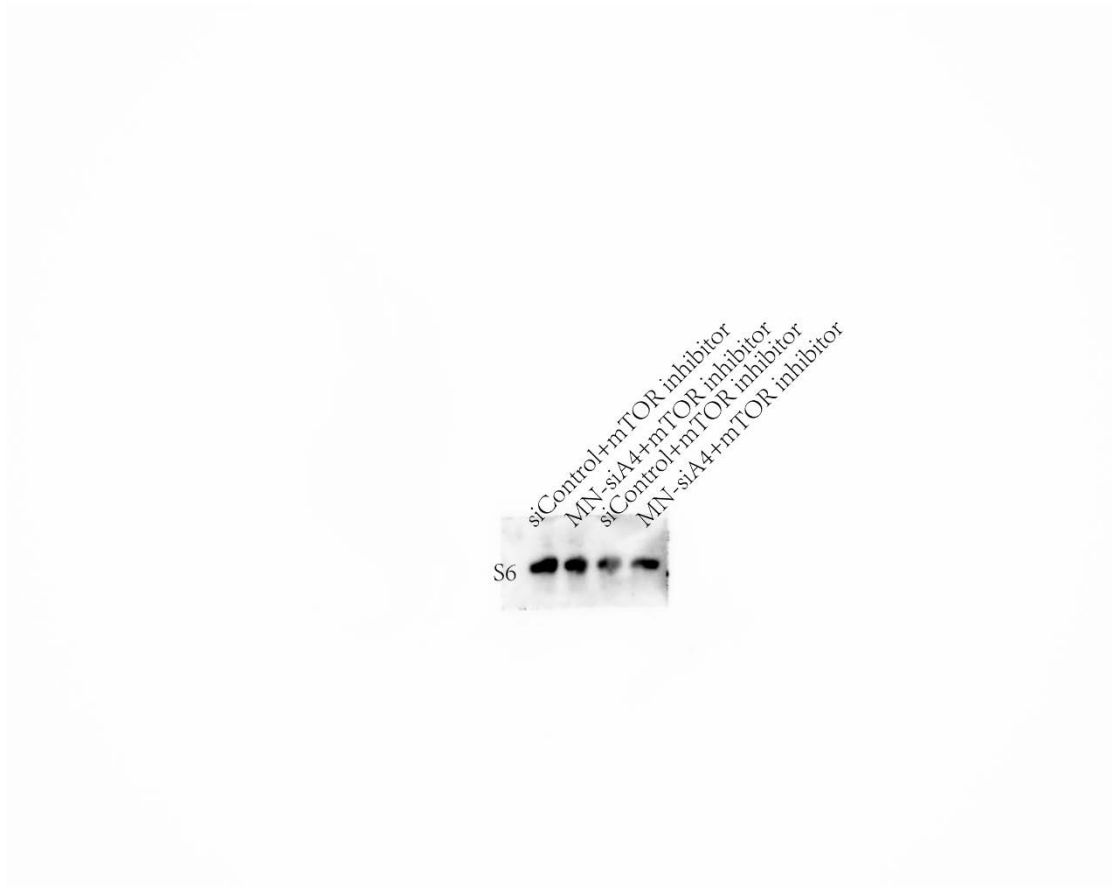

s6 for Fig. 6



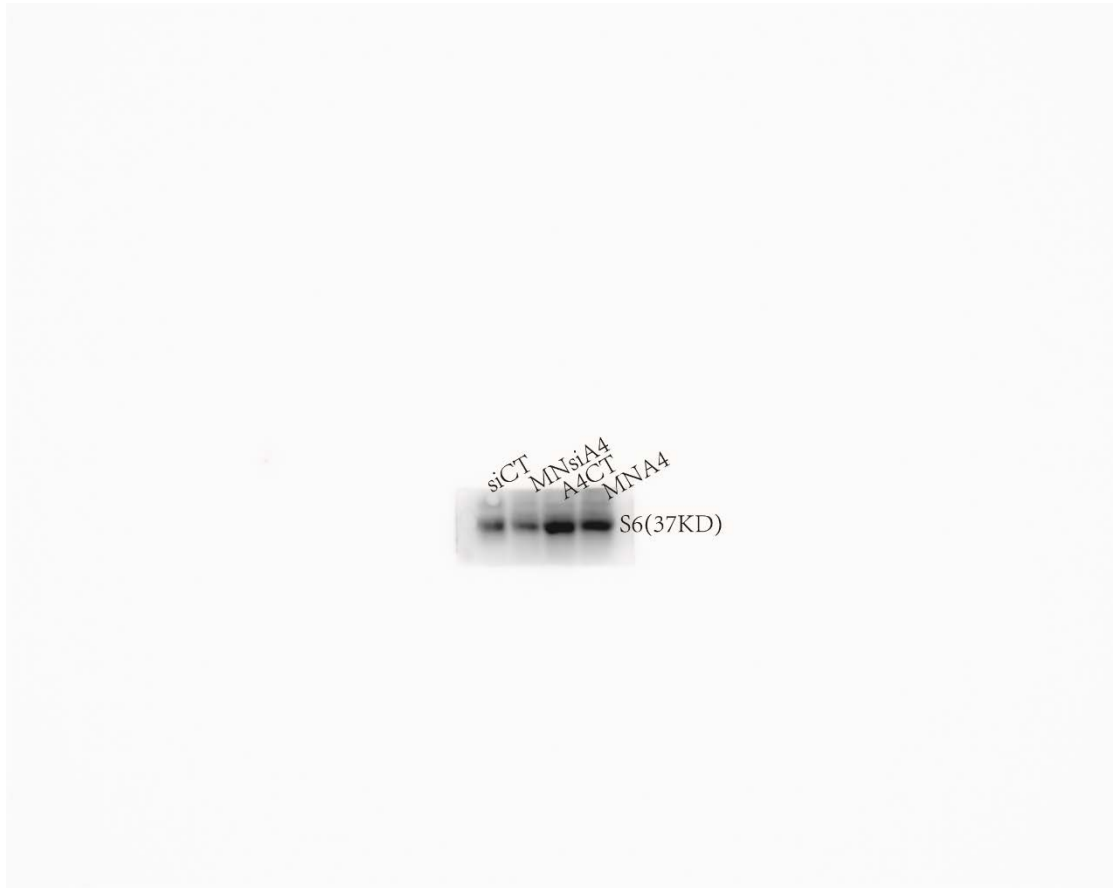

s6\_a4 and sia4

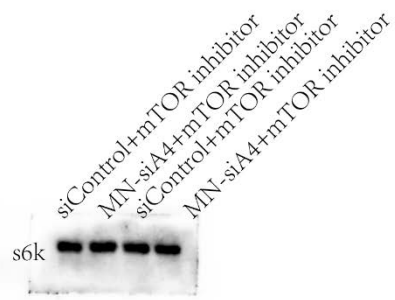

s6k for Fig.6

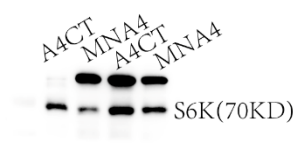

s6k\_a4

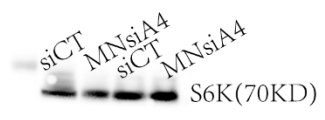

s6k\_sia4

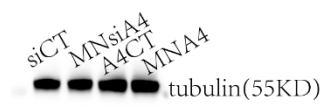

tubulin\_Fig.4

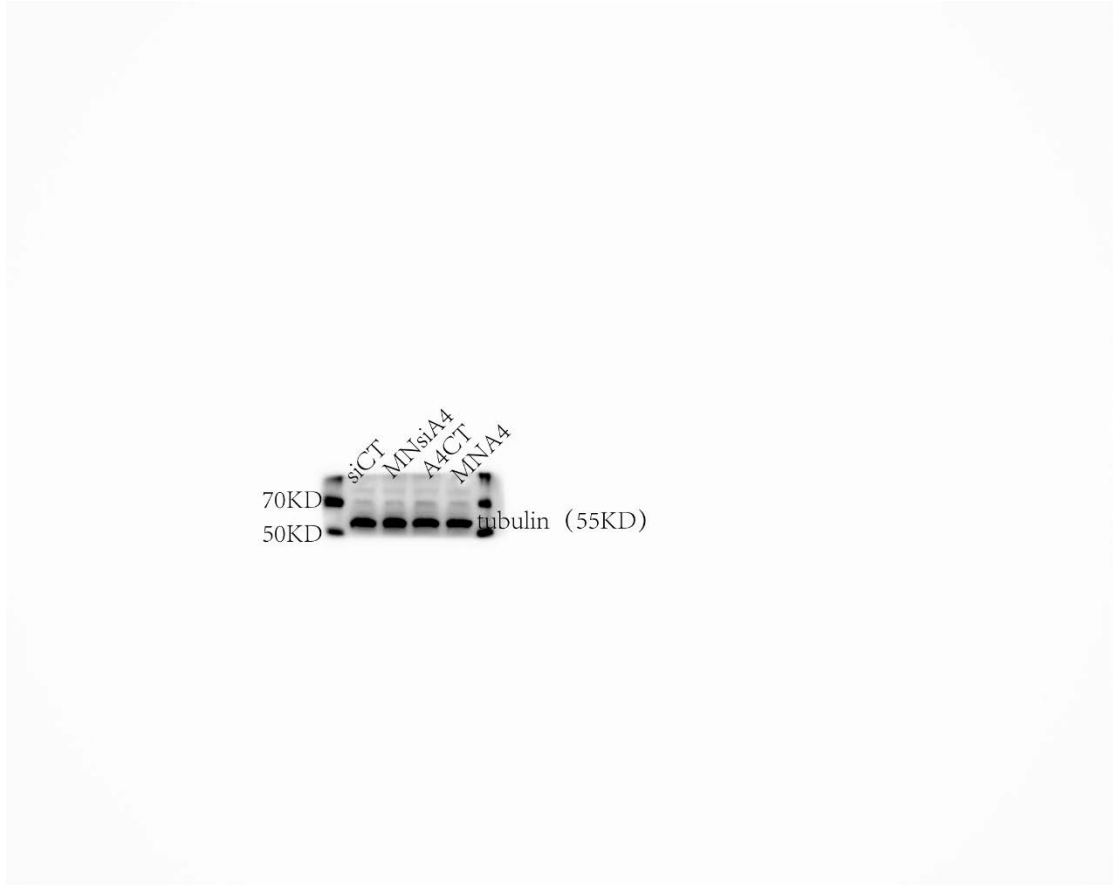

tubulin\_fig4\_1
