# Supplementary material for: ANGPTL4 negatively regulates the progression of osteosarcoma by remodeling branched-chain amino acid metabolism
Source: PubMed Central journal article supplement (PMC9035178; doi:10.1038/s41420-022-01029-x), 2022-04-23
Supplement: 41420_2022_1029_MOESM8_ESM.pdf [file 41420_2022_1029_MOESM8_ESM.pdf]

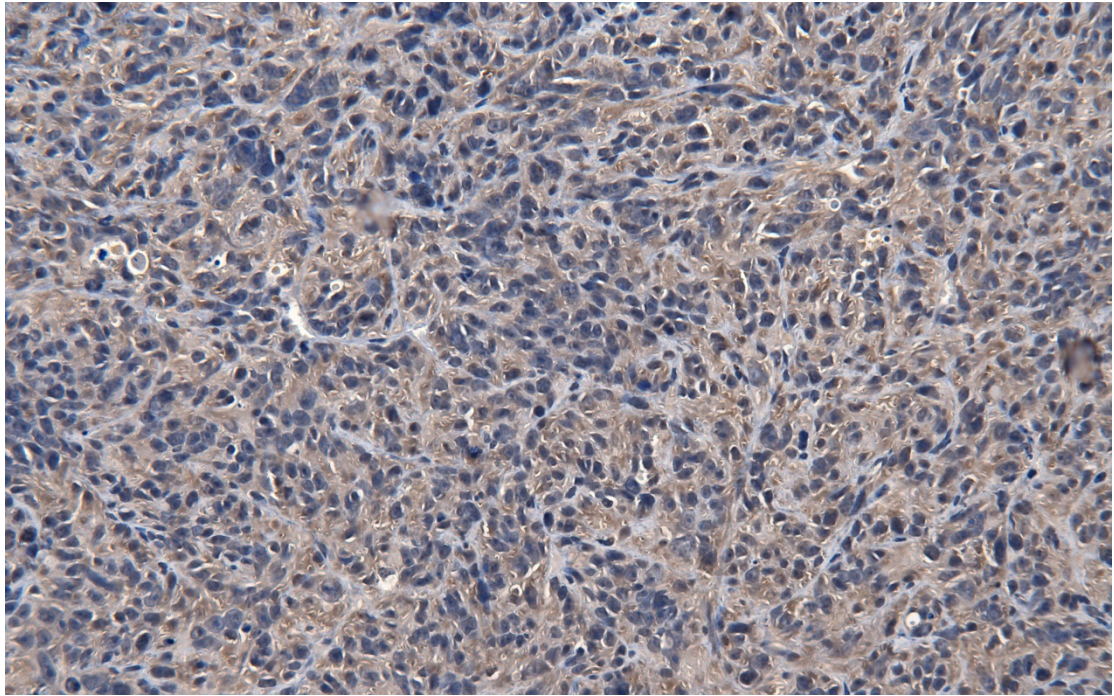

ANG4\_A4Control\_1

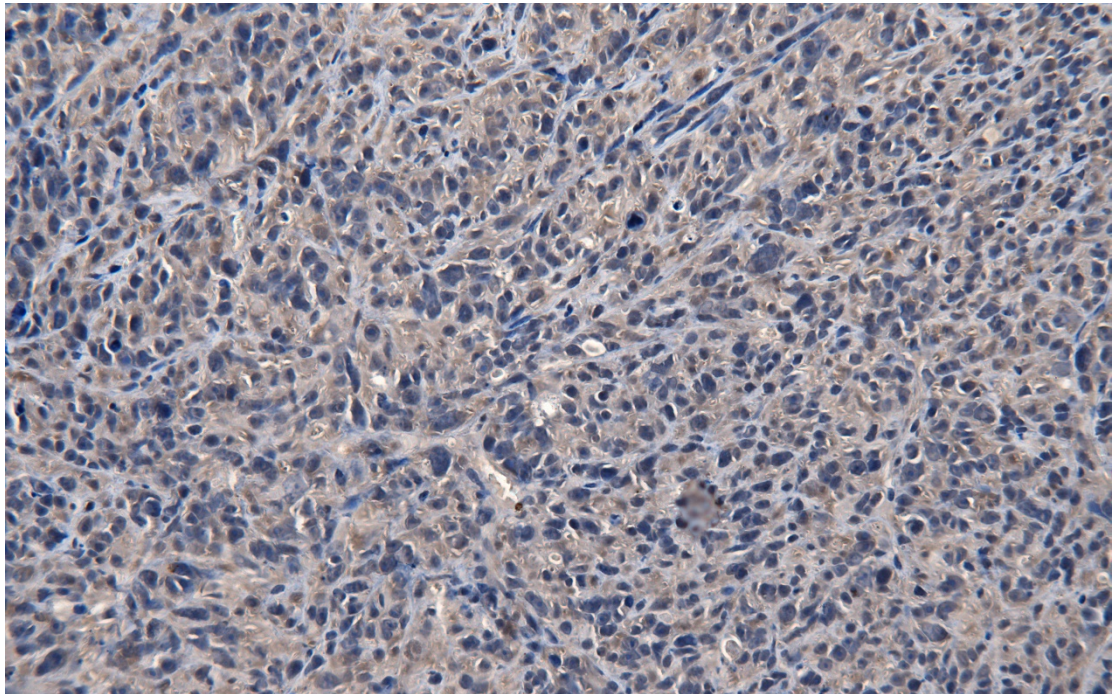

ANG4\_A4Control\_2

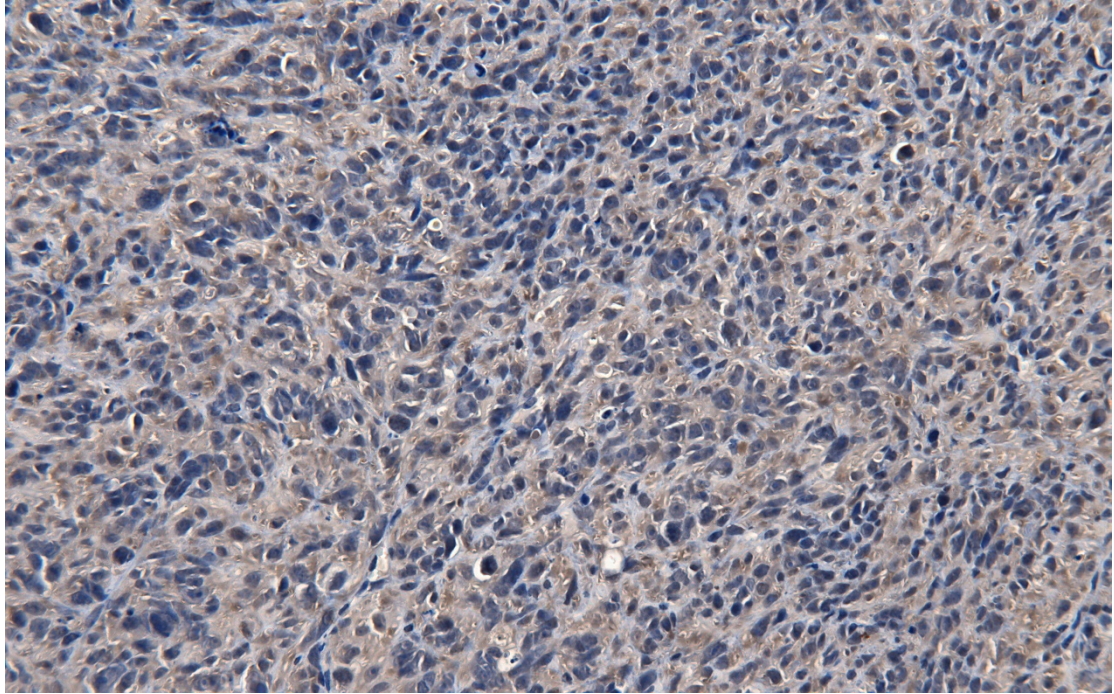

ANG4\_A4Control\_3

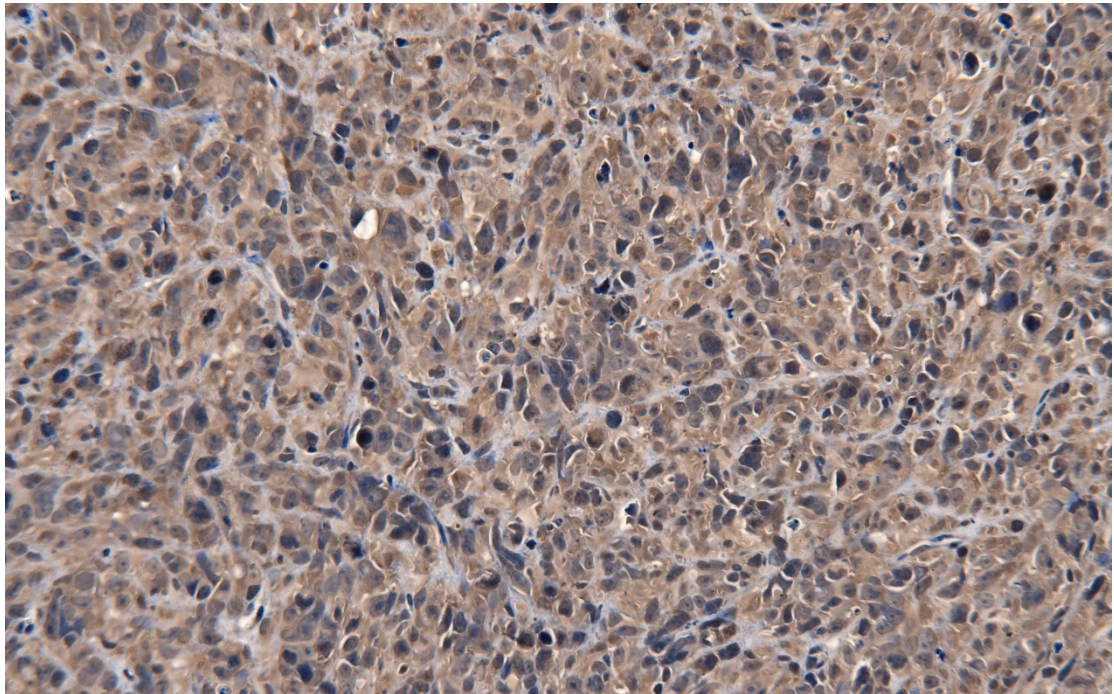

ANG4\_MNA4\_1

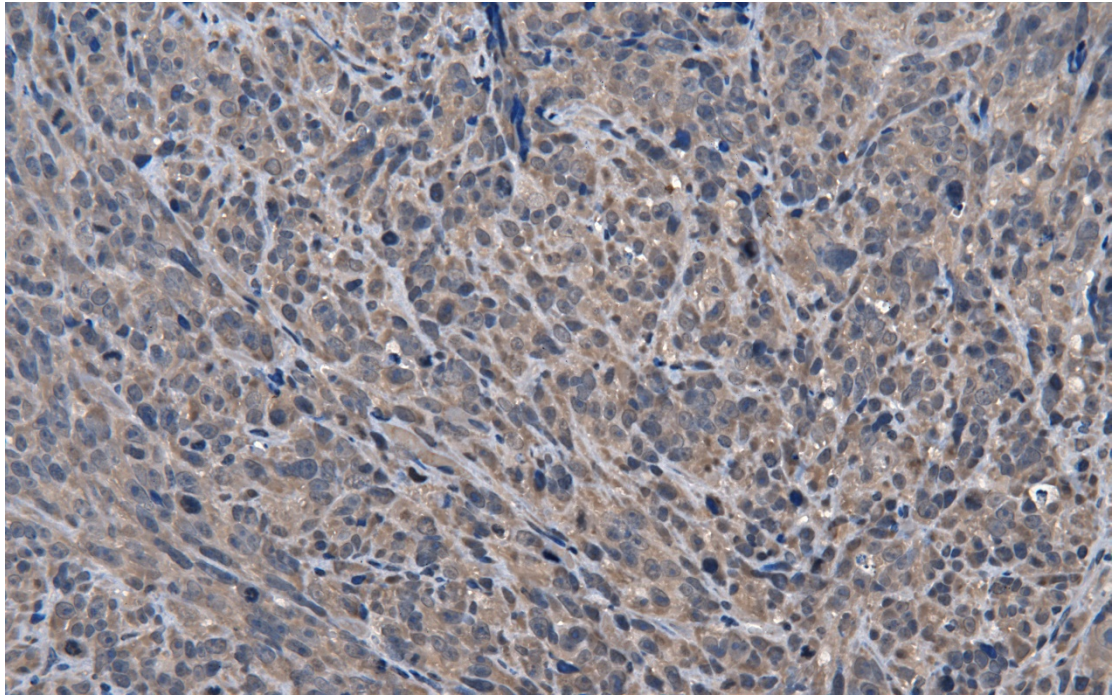

ANG4\_MNA4\_2

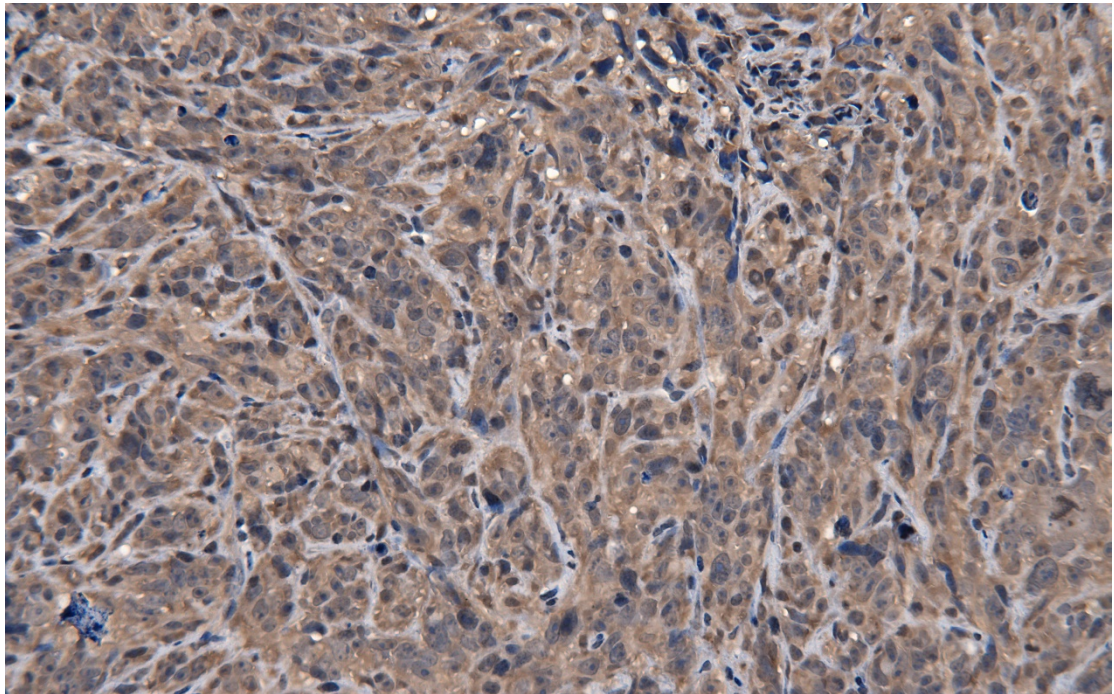

ANG4\_MNA4\_3

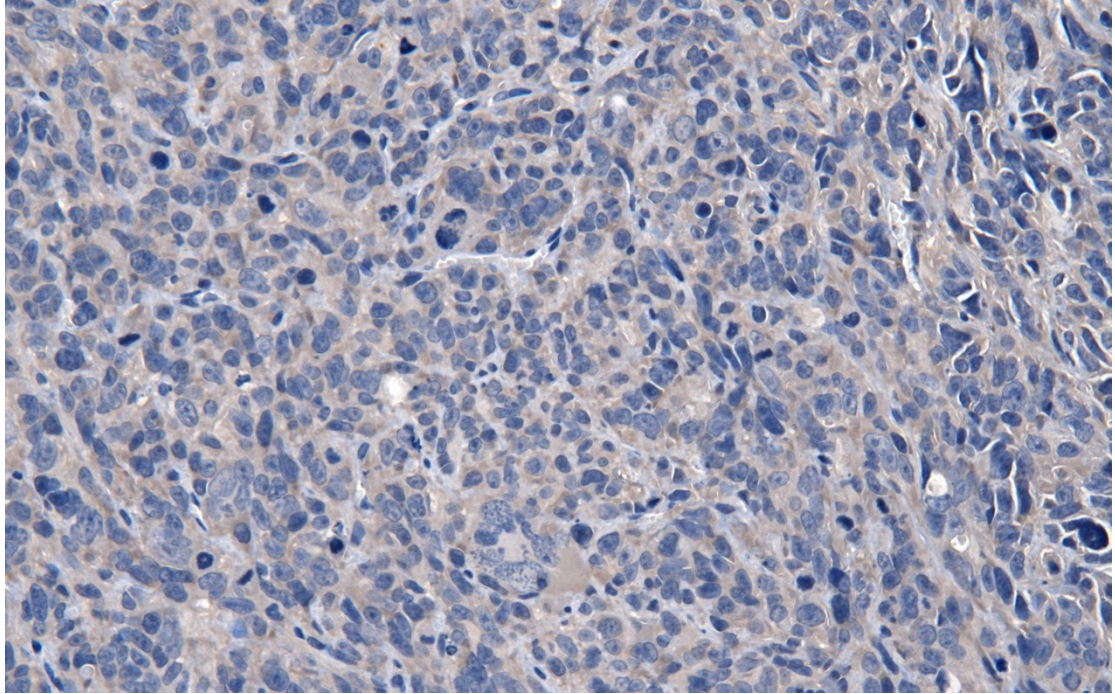

ANG4\_MNsiA4\_1

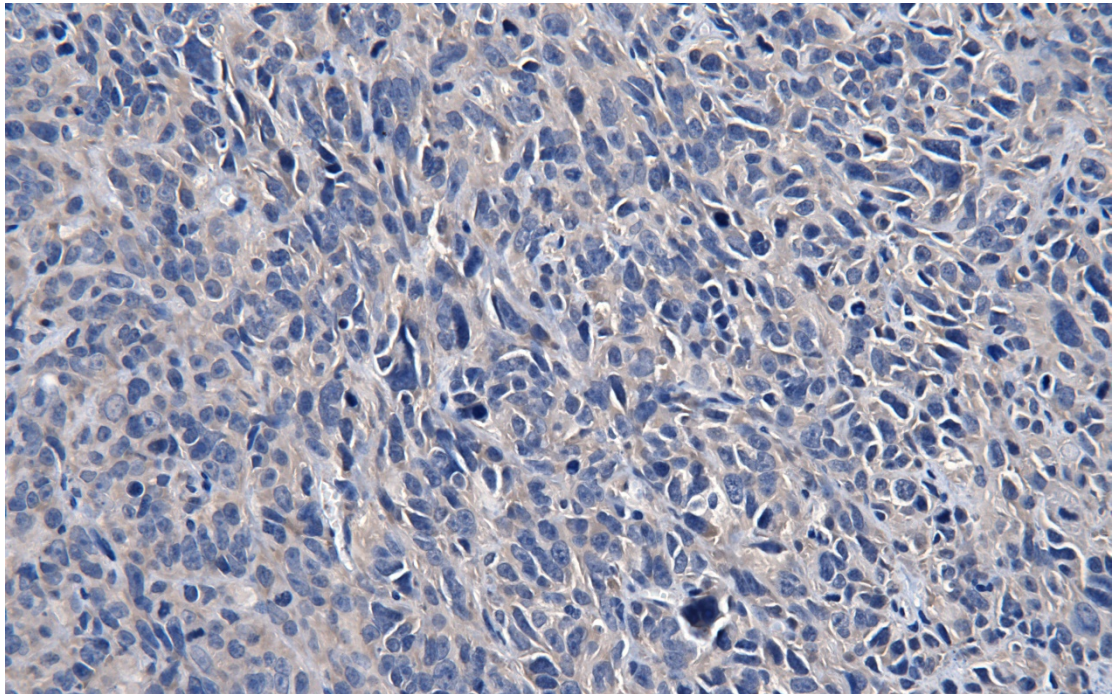

ANG4\_MNsiA4\_2

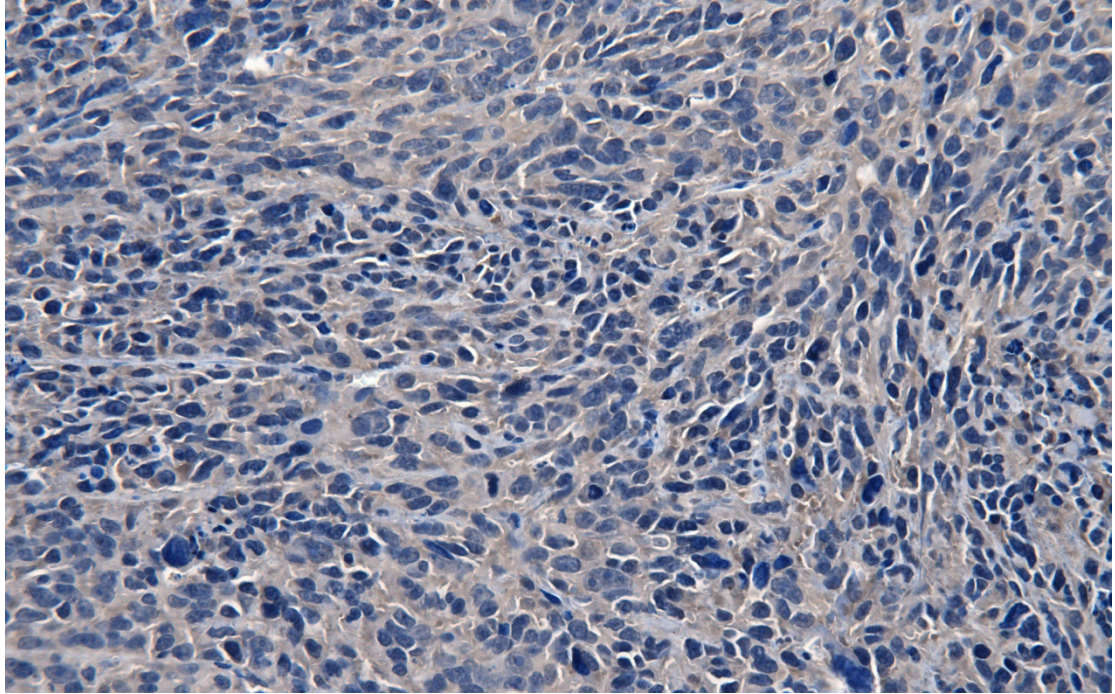

ANG4\_MNsiA4\_3

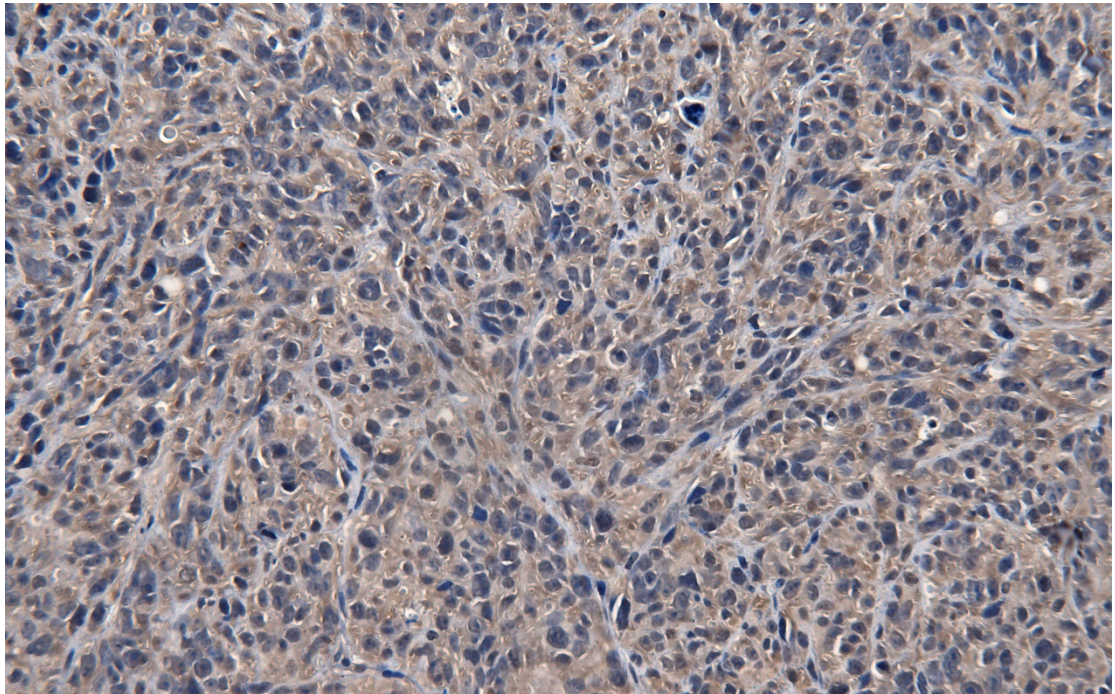

ANG4\_siControl\_1

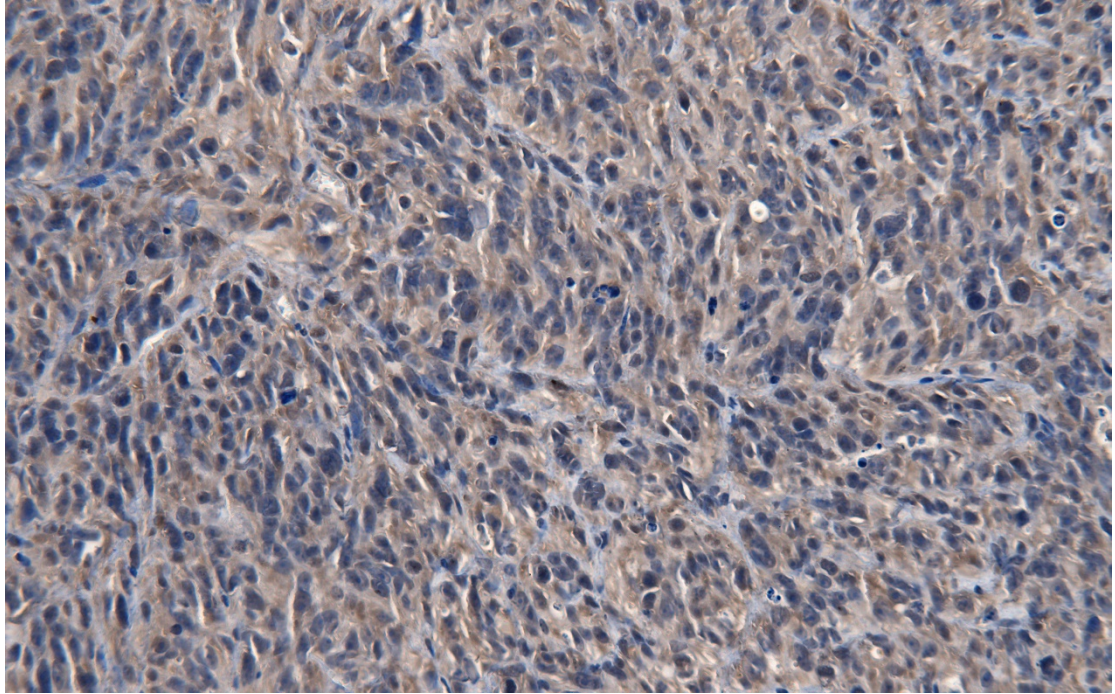

ANG4\_siControl\_2

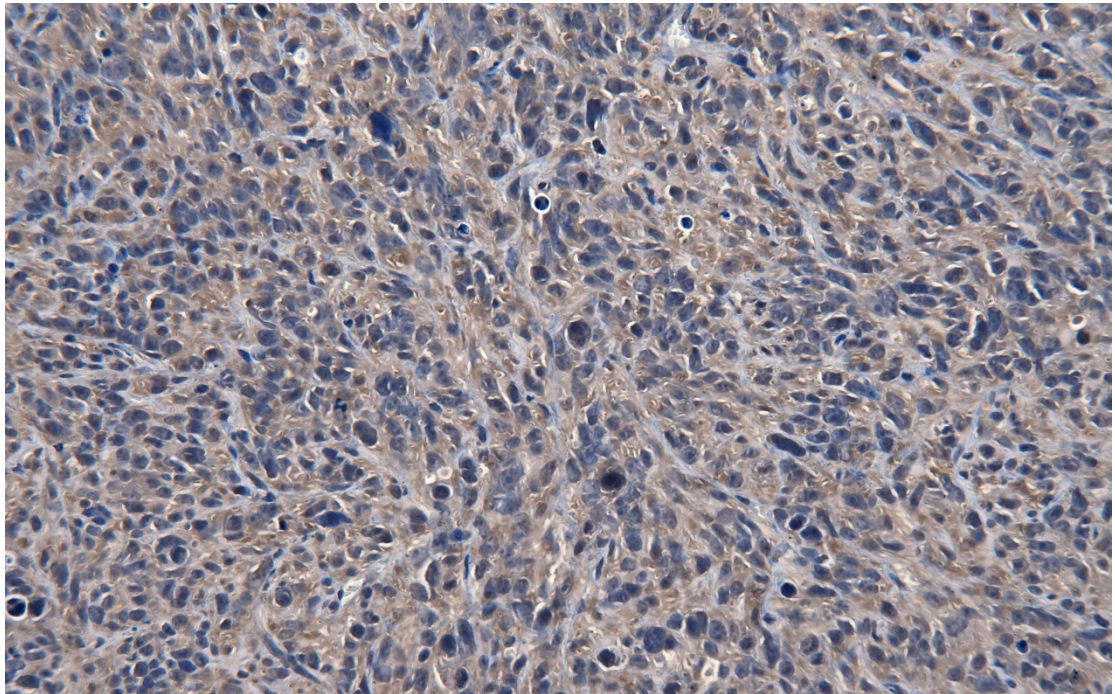

ANG4\_siControl\_3

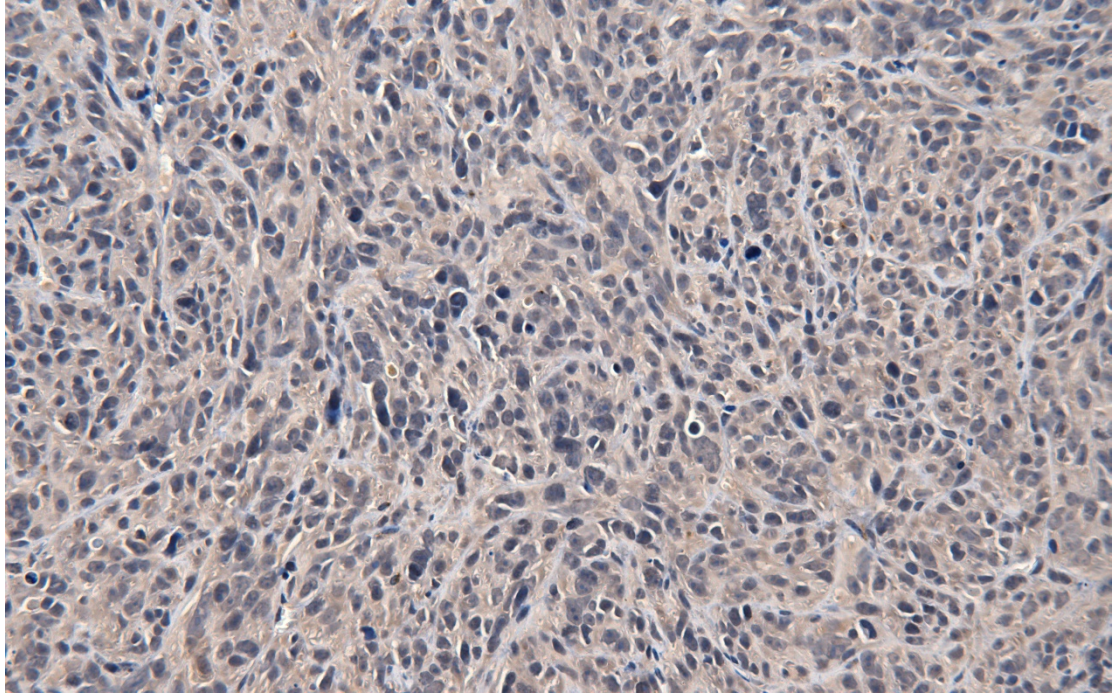

BCAT1\_A4Control\_1

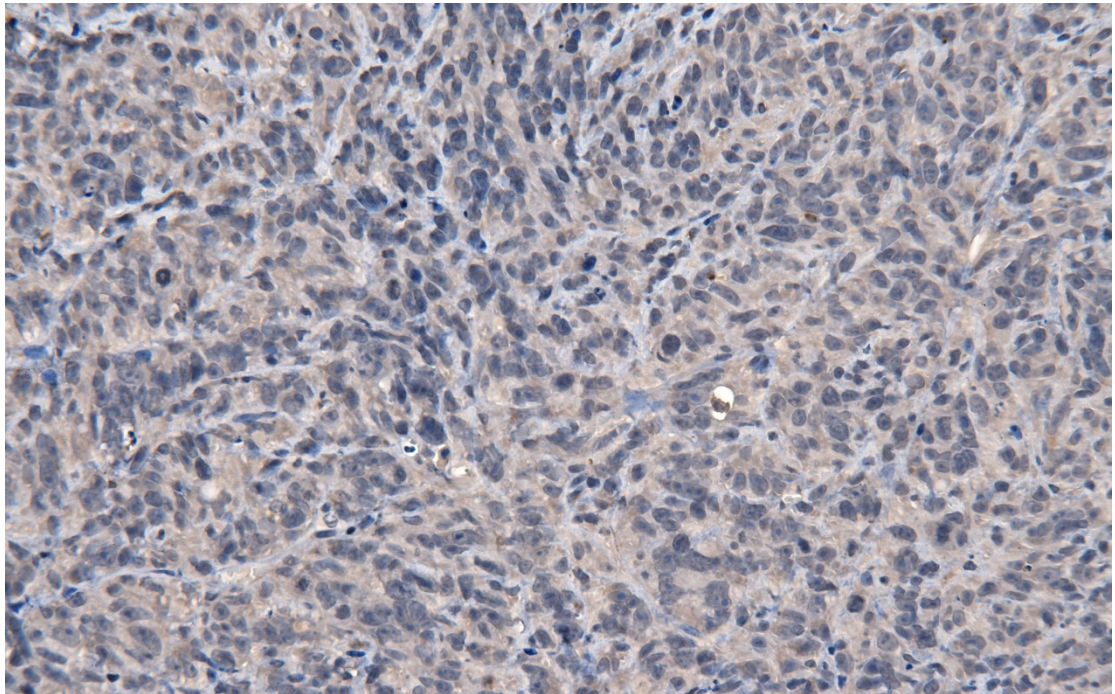

BCAT1\_A4Control\_2

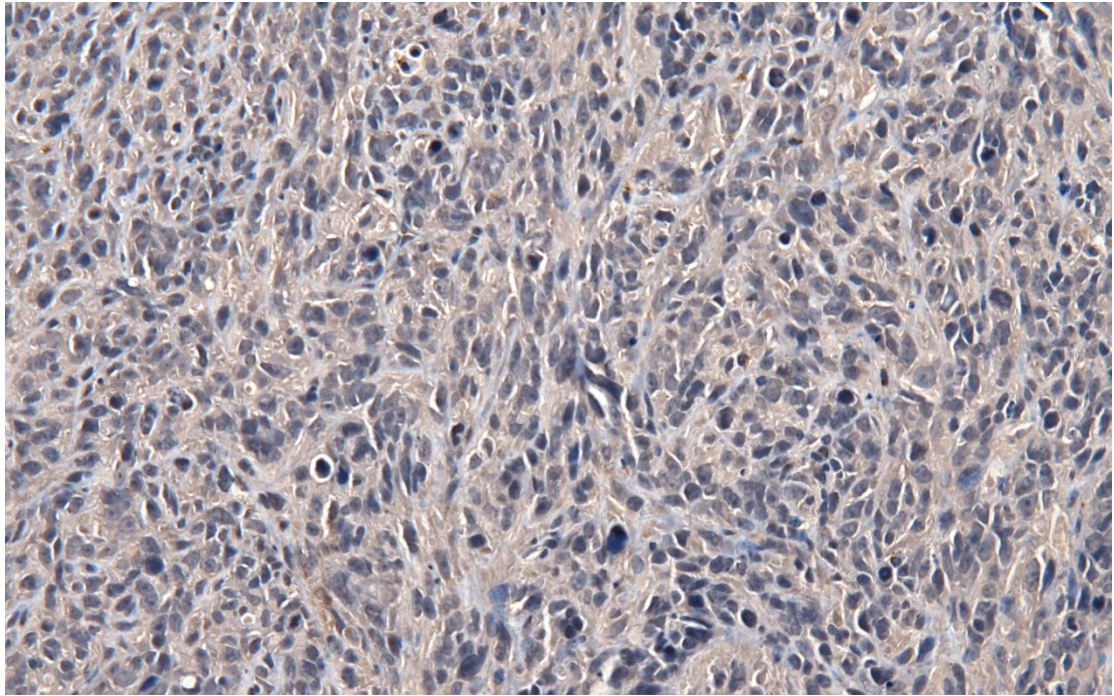

BCAT1\_A4Control\_3

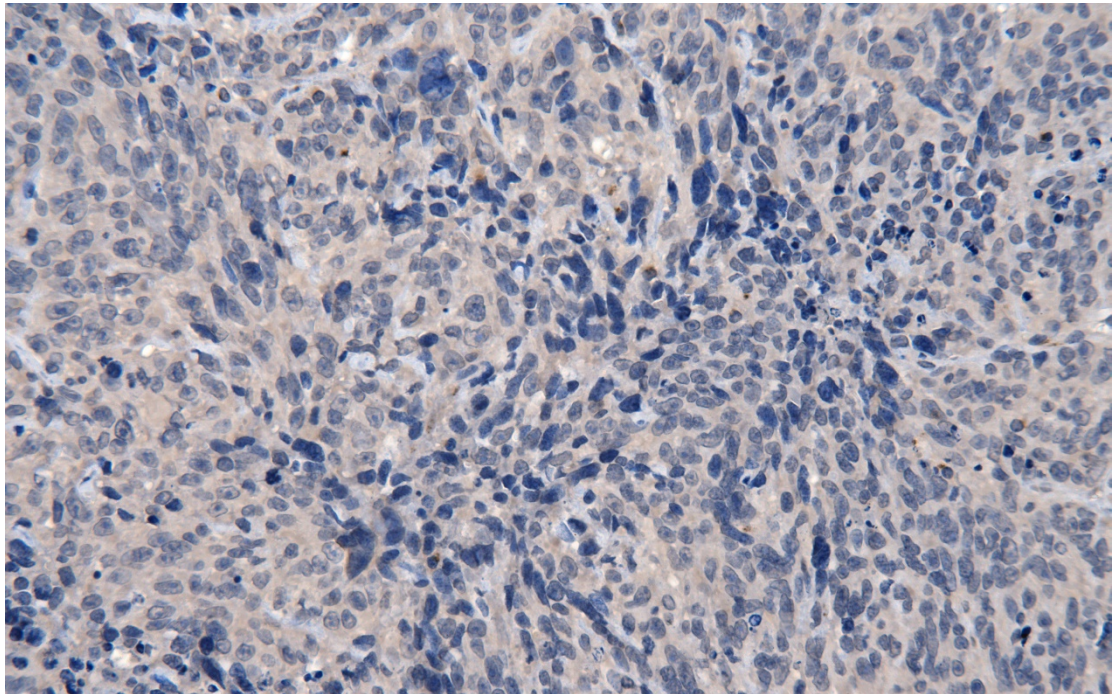

BCAT1\_MNA4\_1



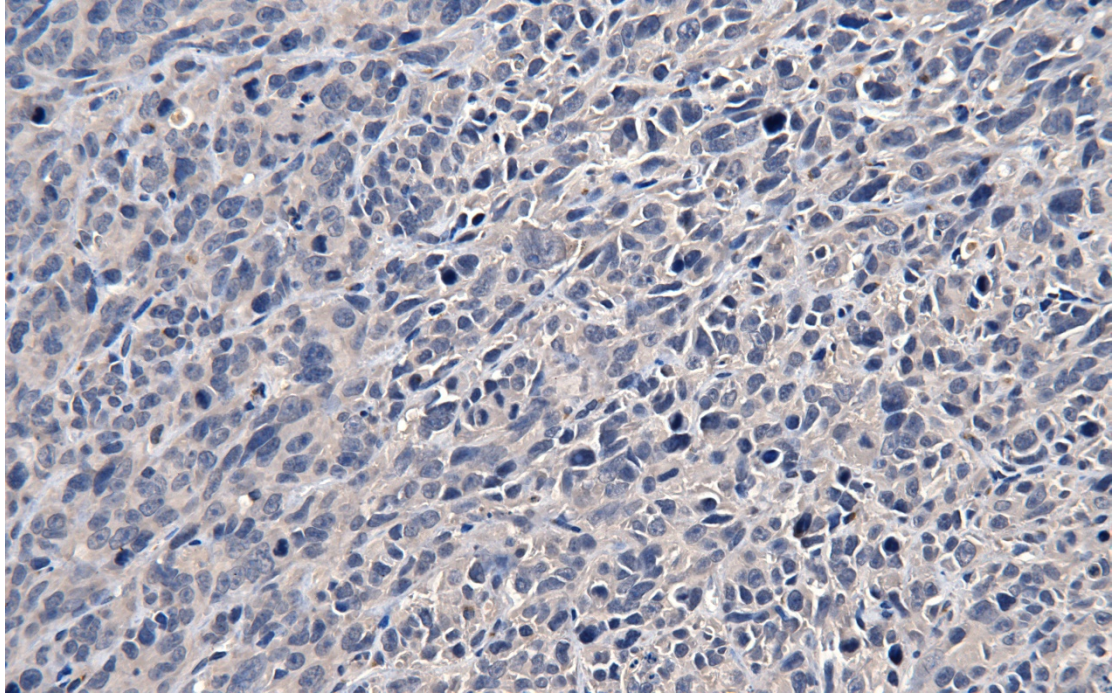

BCAT1\_MNA4\_2

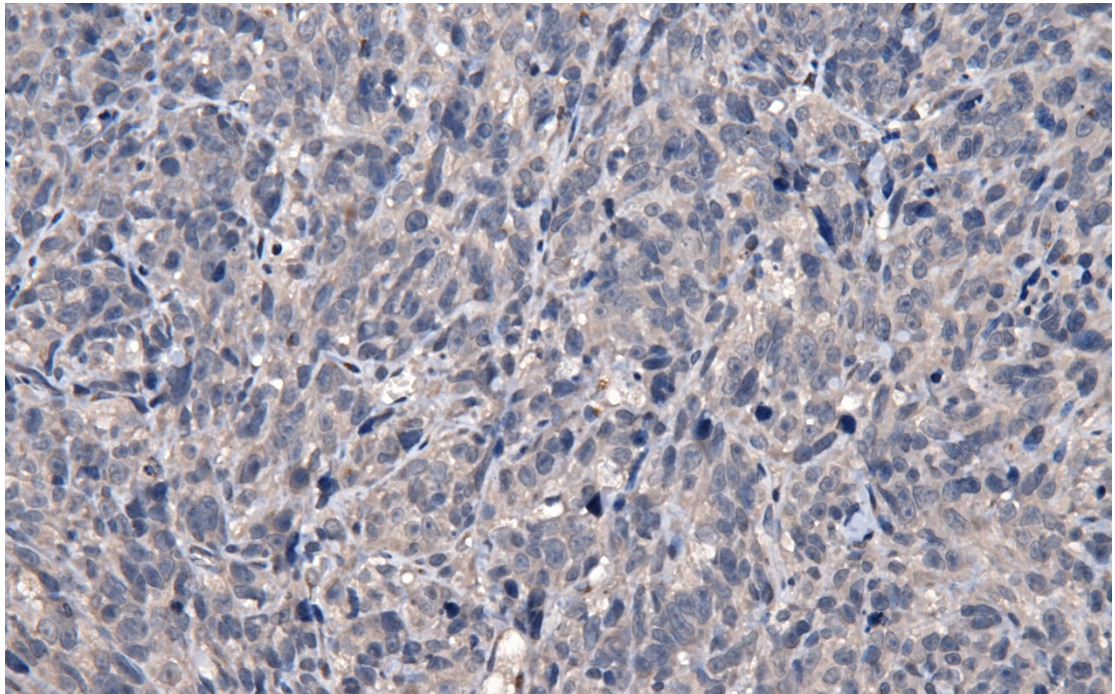

BCAT1\_MNA4\_3

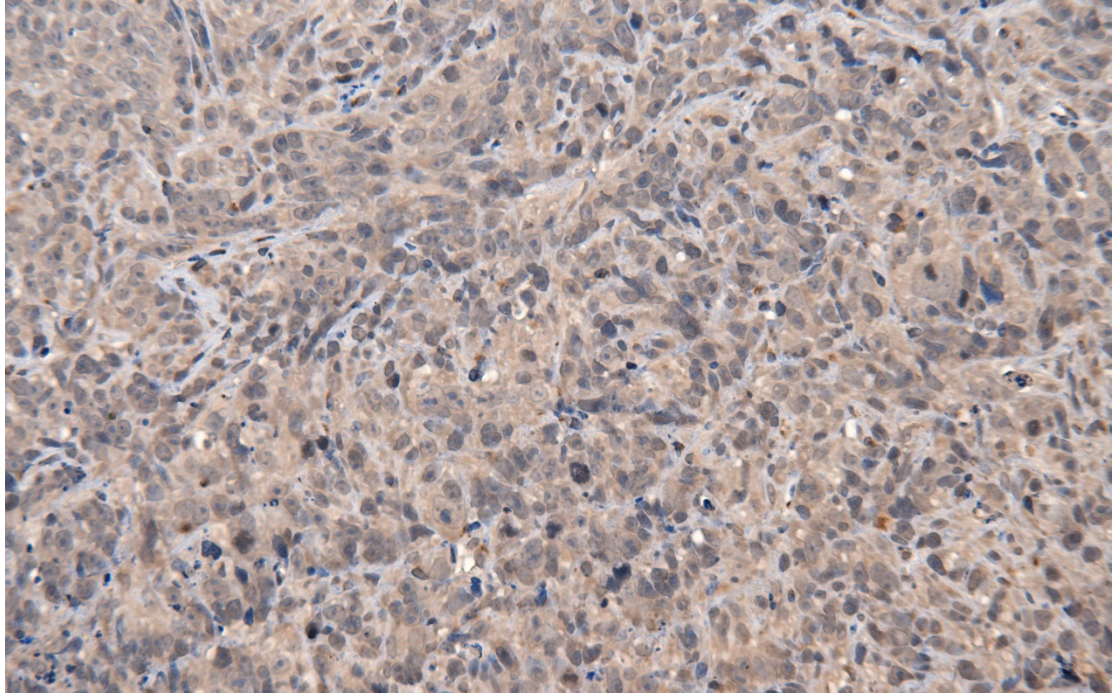

BCAT1\_MNsiA4\_1

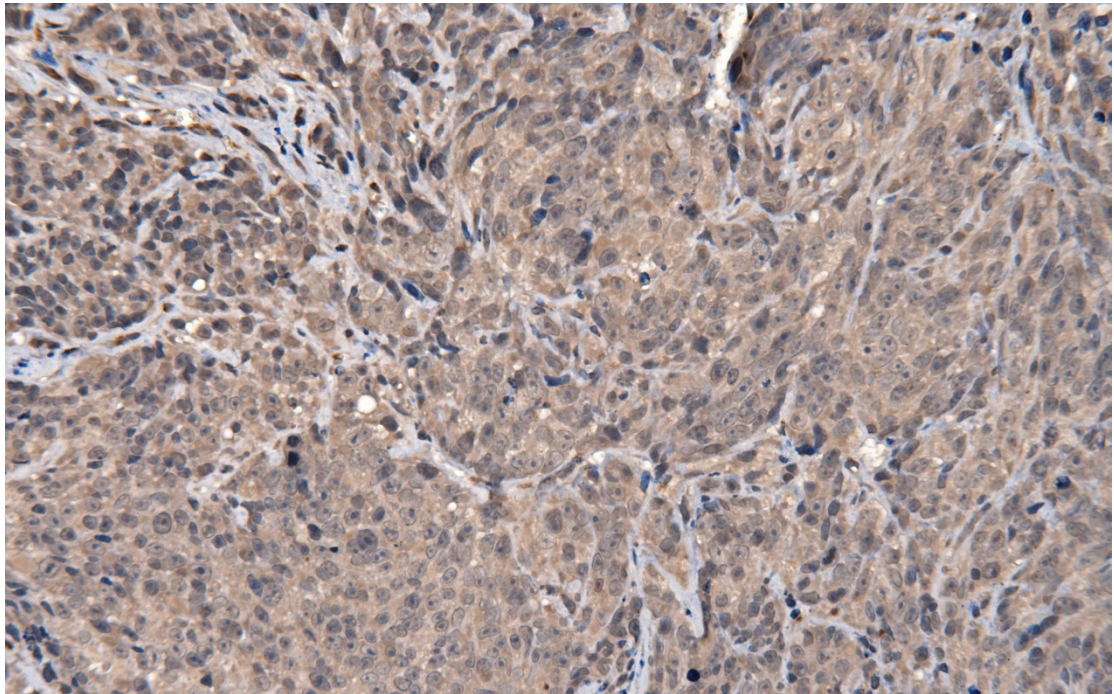

BCAT1\_MNsiA4\_2

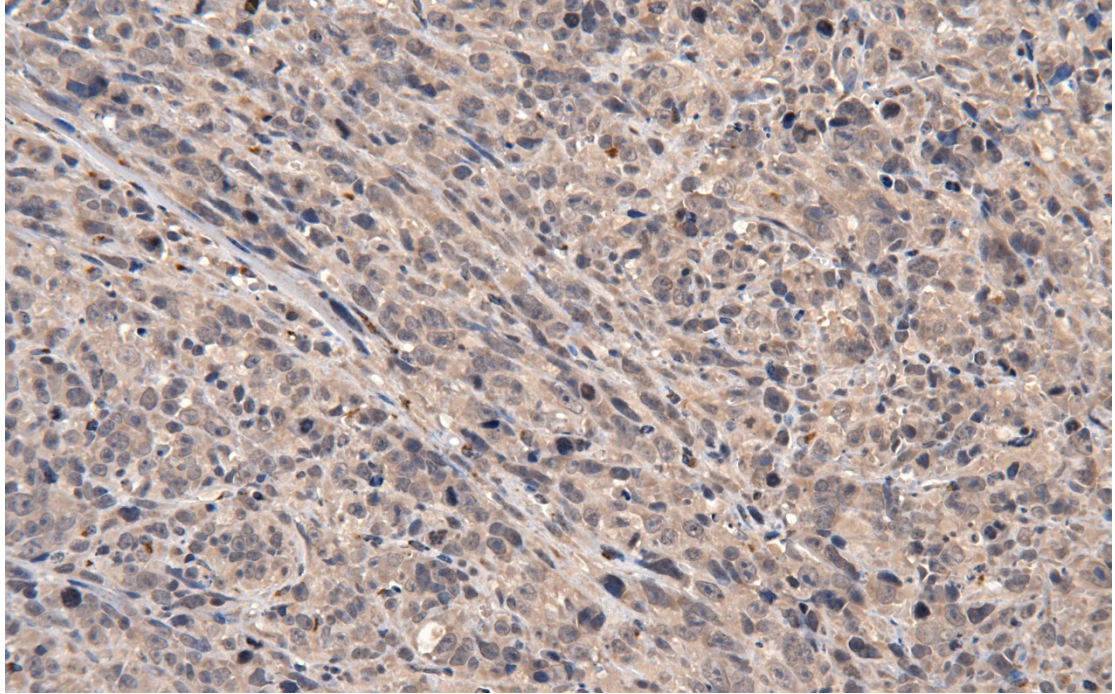

BCAT1\_MNsiA4\_3

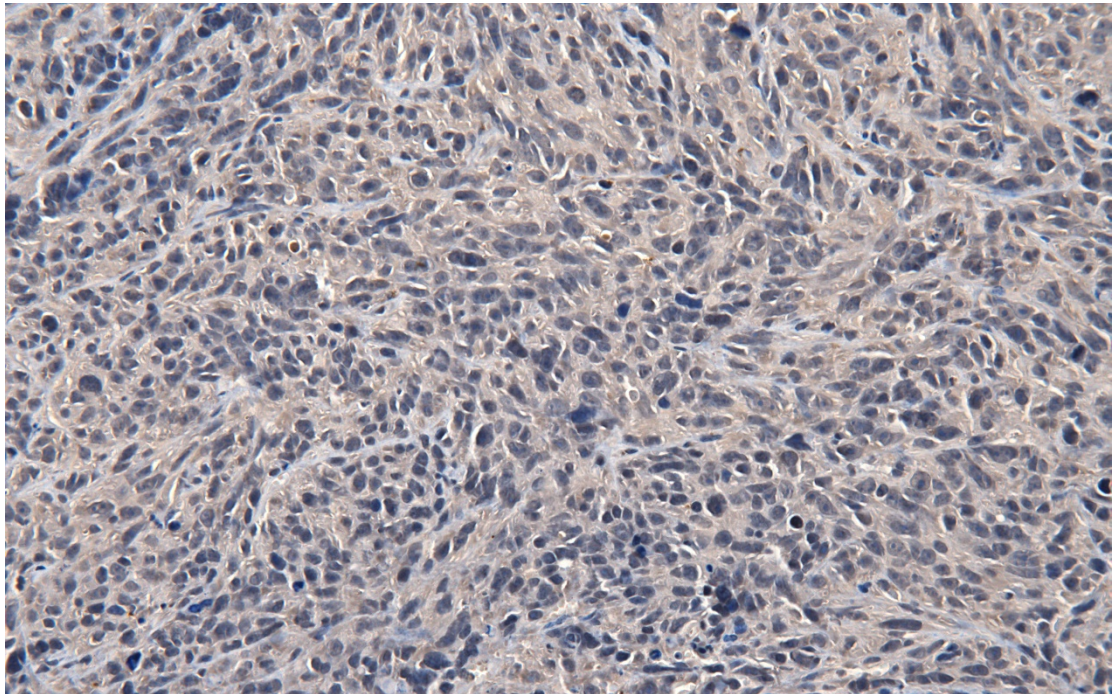

BCAT1\_siControl\_1

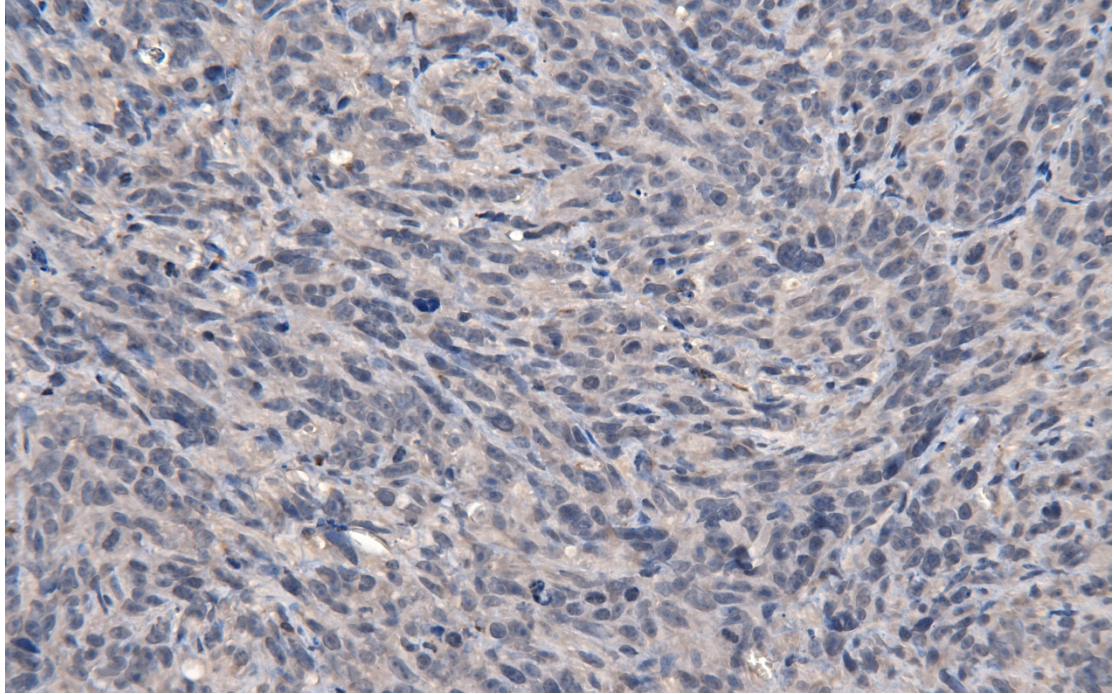

BCAT1\_siControl\_2

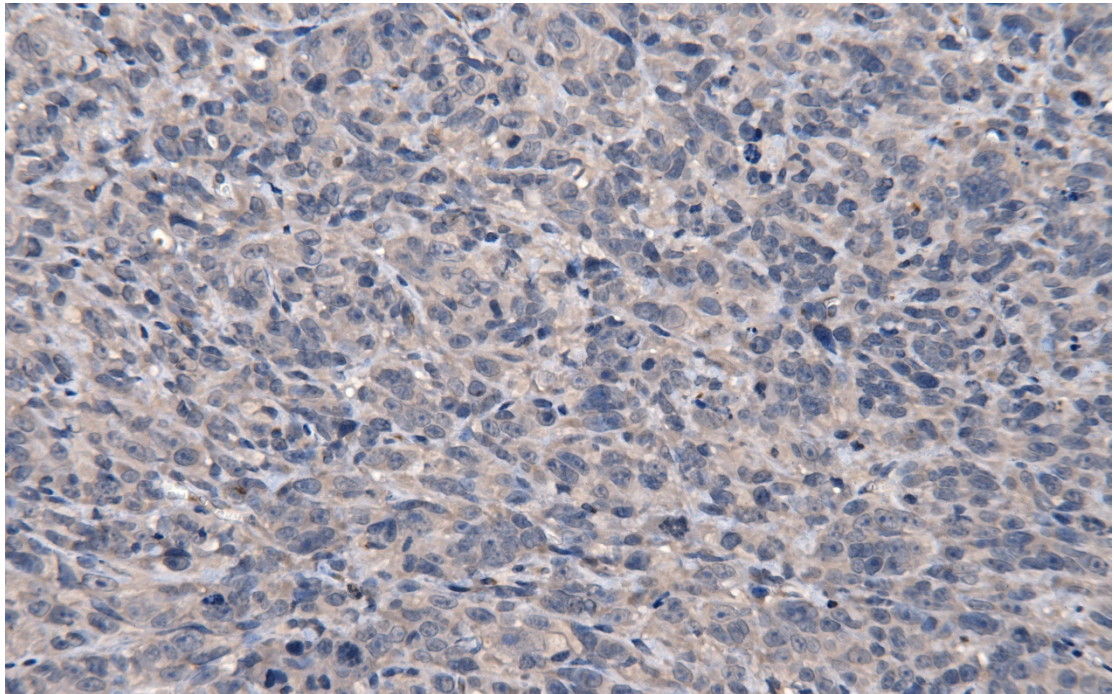

BCAT1\_siControl\_3

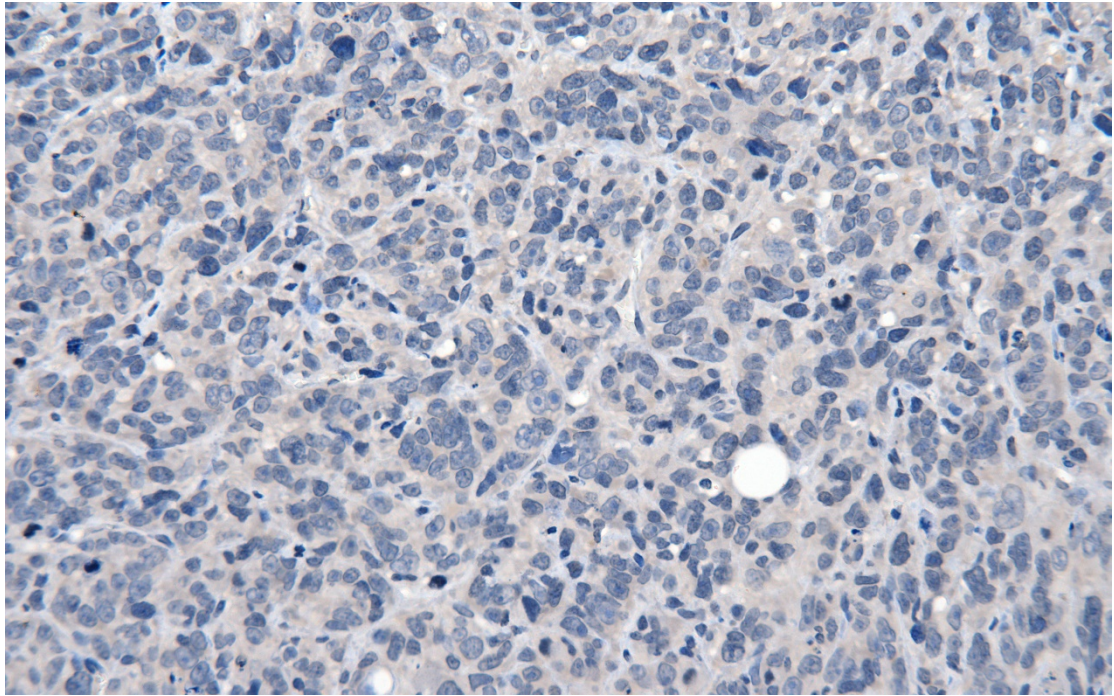

BCKDHA\_A4Control\_1

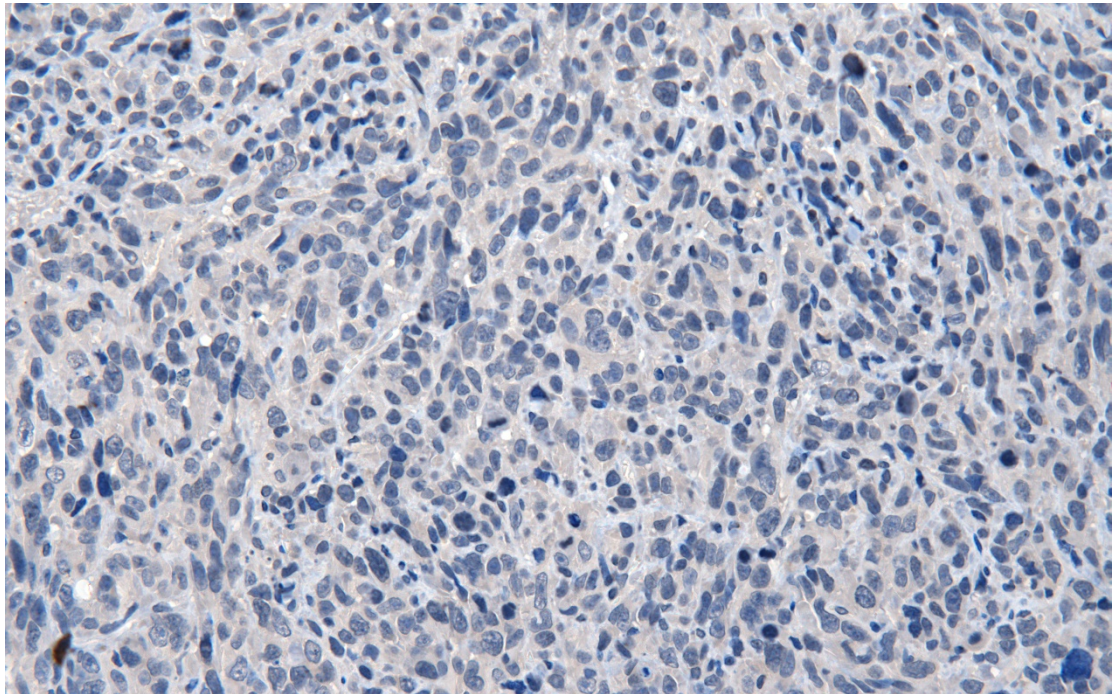

BCKDHA\_A4Control\_2

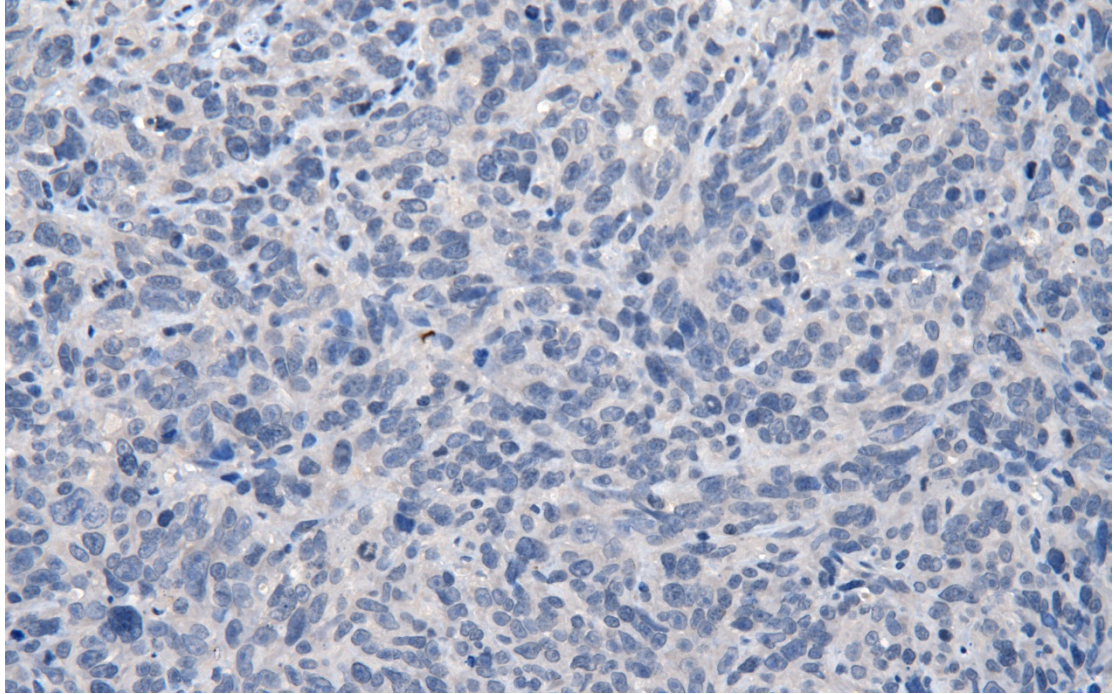

BCKDHA\_A4Control\_3

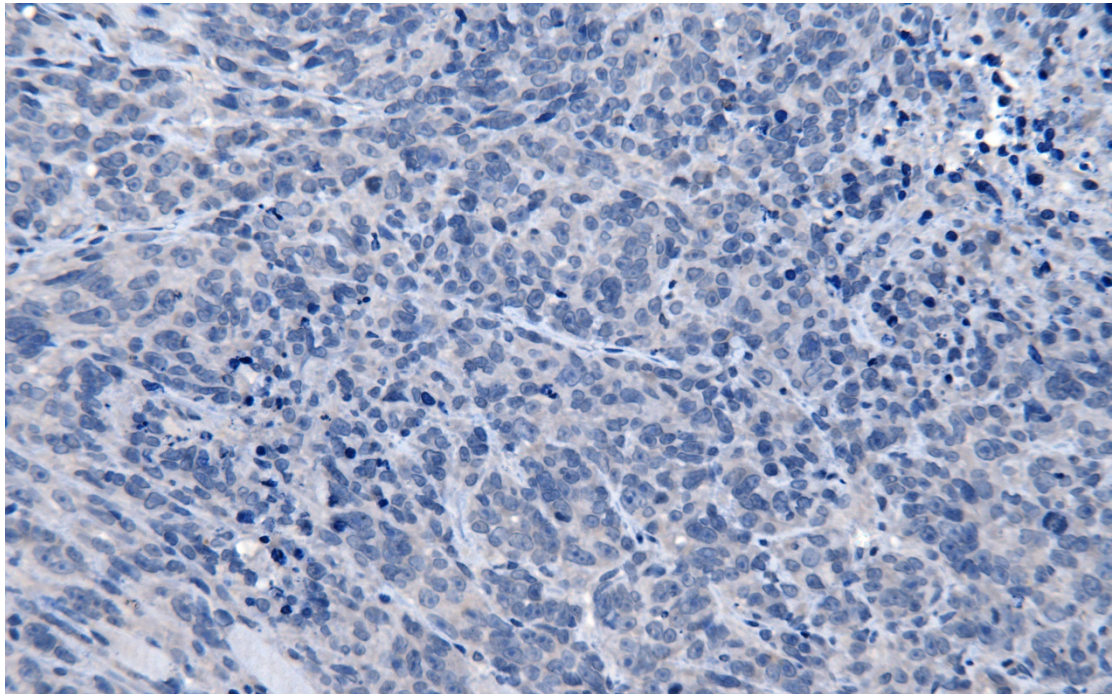

BCKDHA\_MNA4\_1

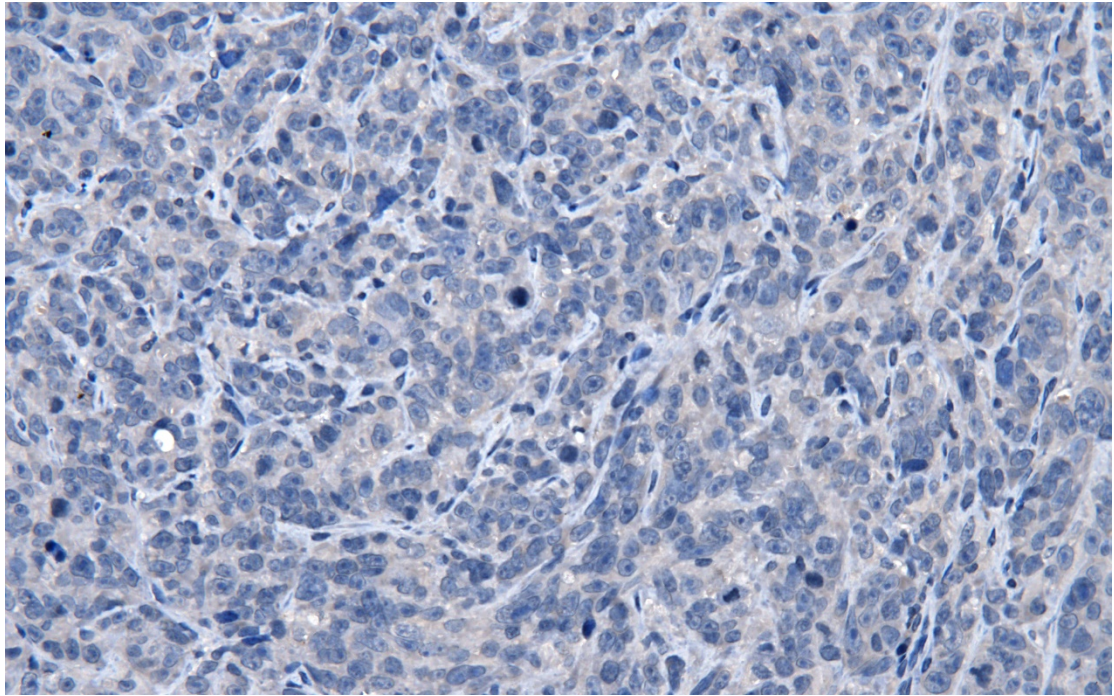

BCKDHA\_MNA4\_2

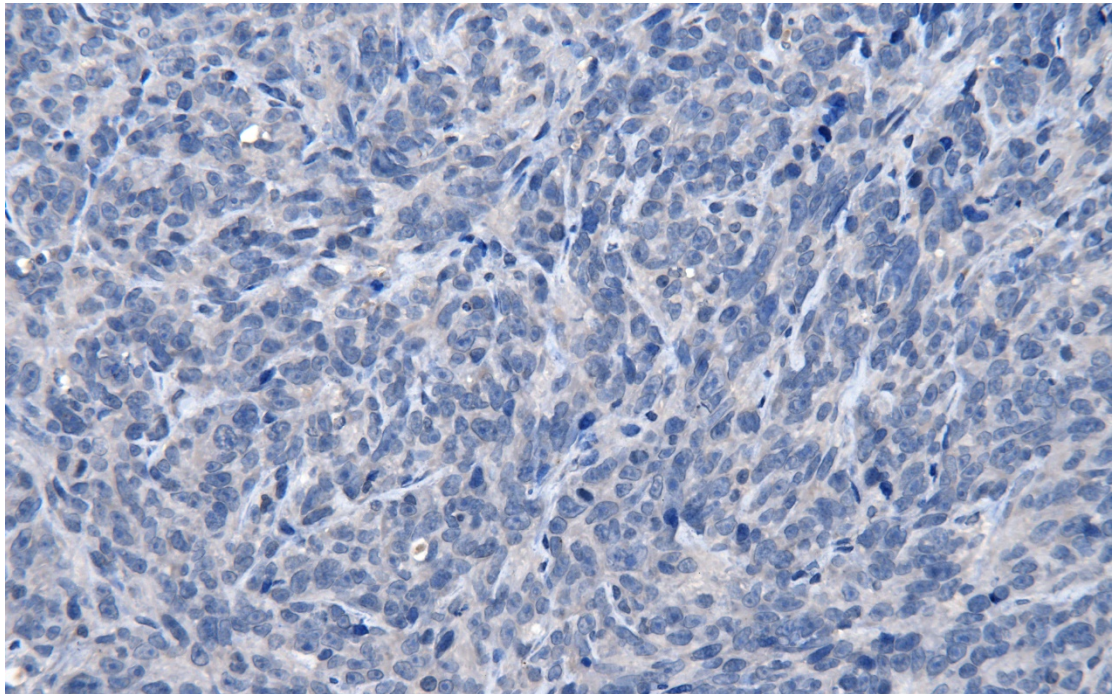

BCKDHA\_MNA4\_3

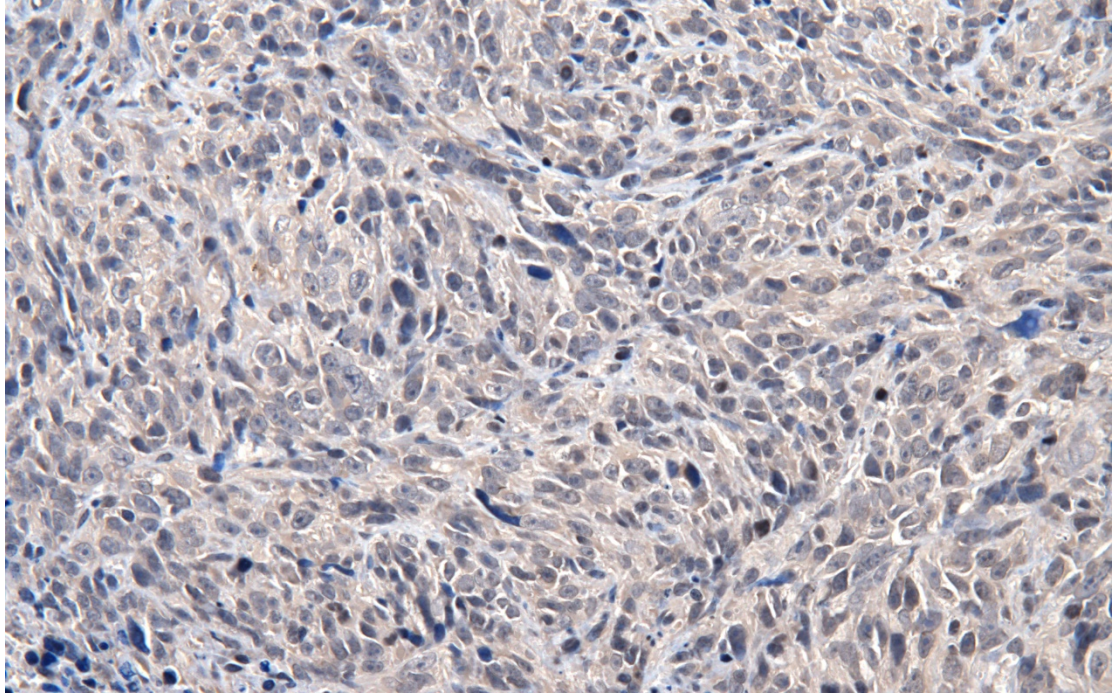

BCKDHA\_MNsiA4\_1

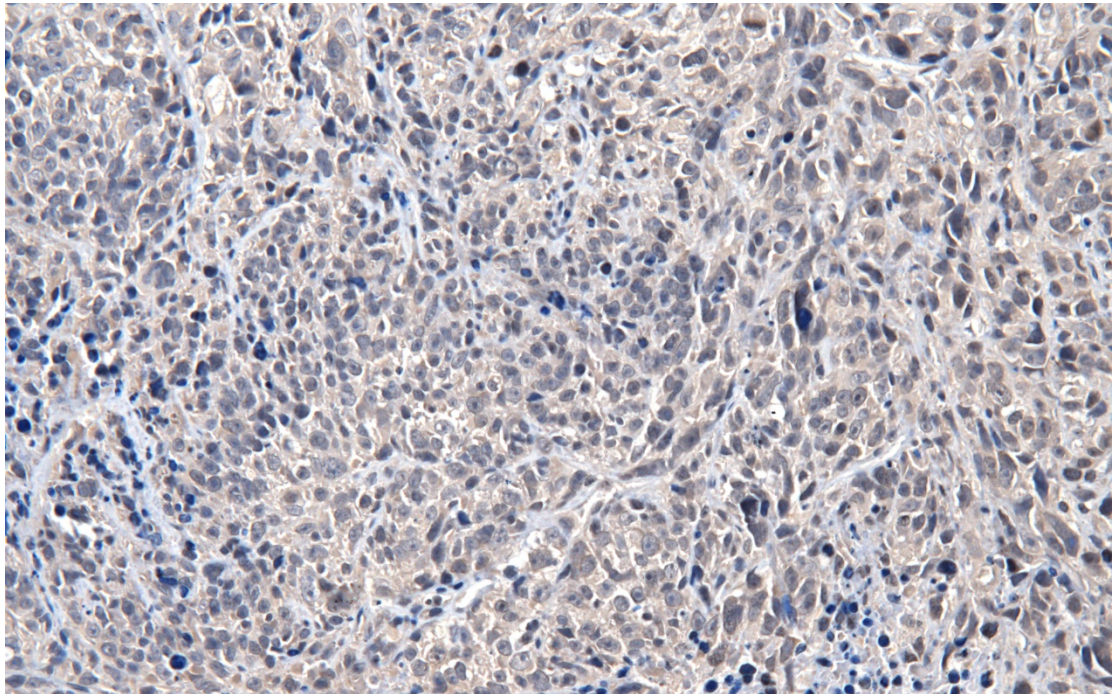

BCKDHA\_MNsiA4\_2



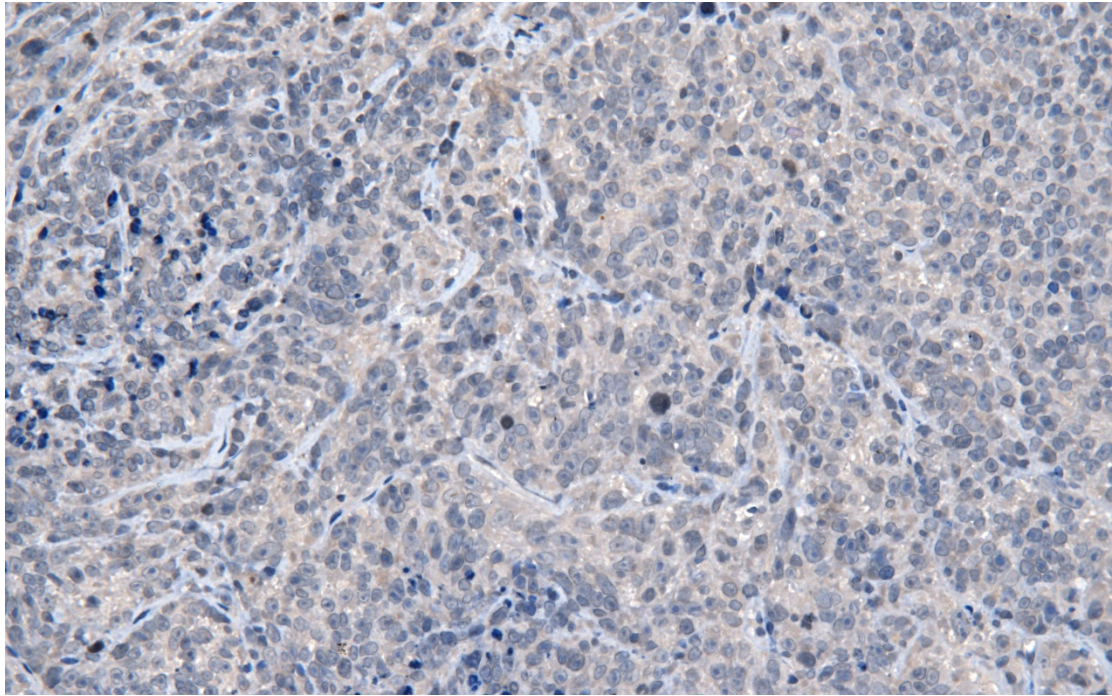

BCKDHA\_MNsiA4\_3

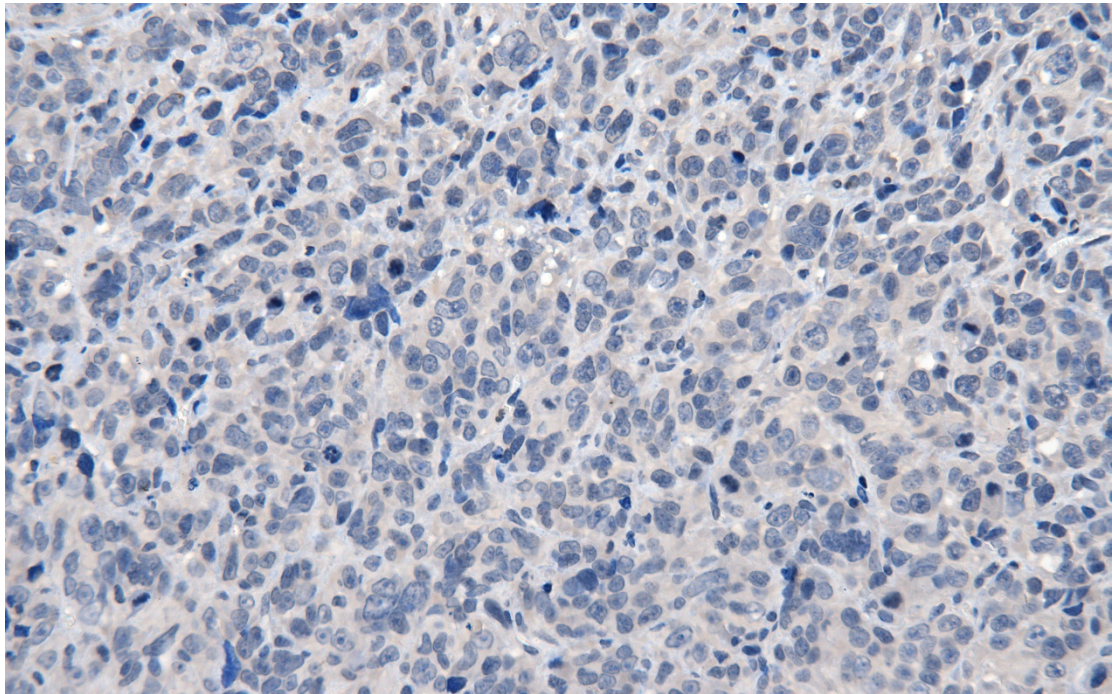

BCKDHA\_siControl\_1

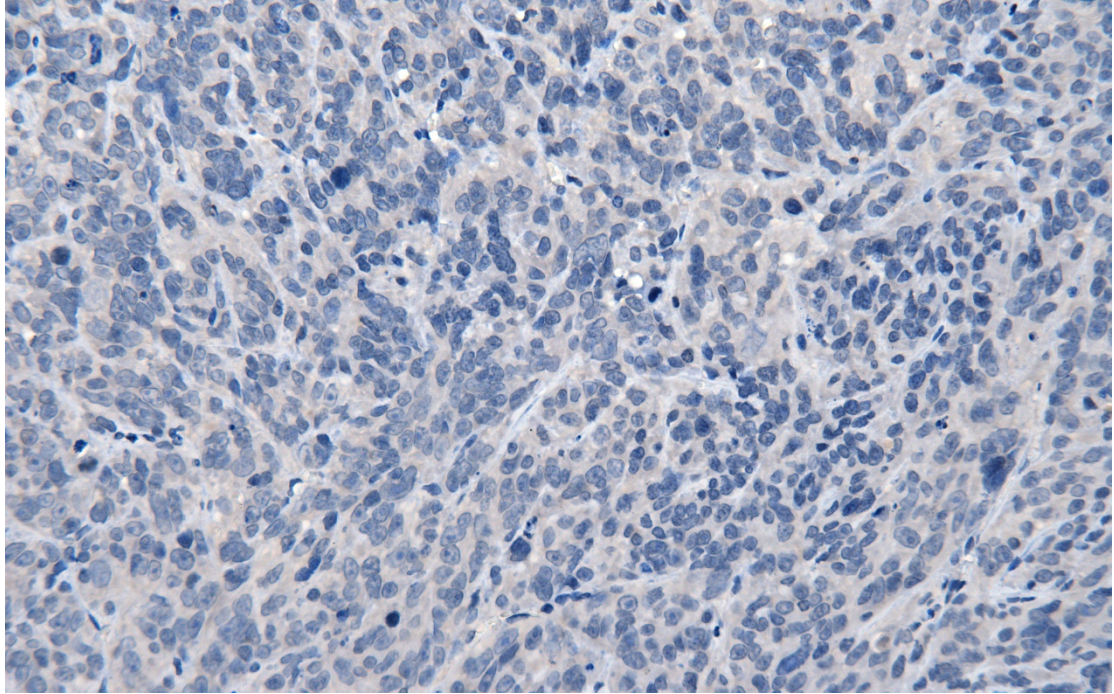

BCKDHA\_siControl\_2

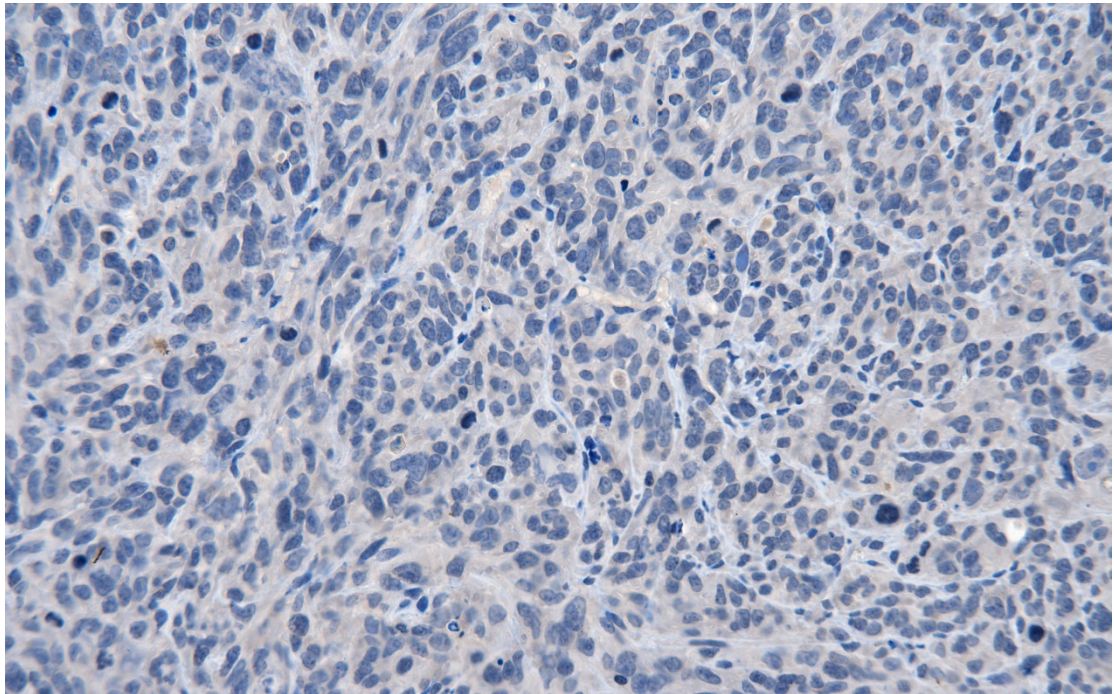

BCKDHA\_siControl\_3

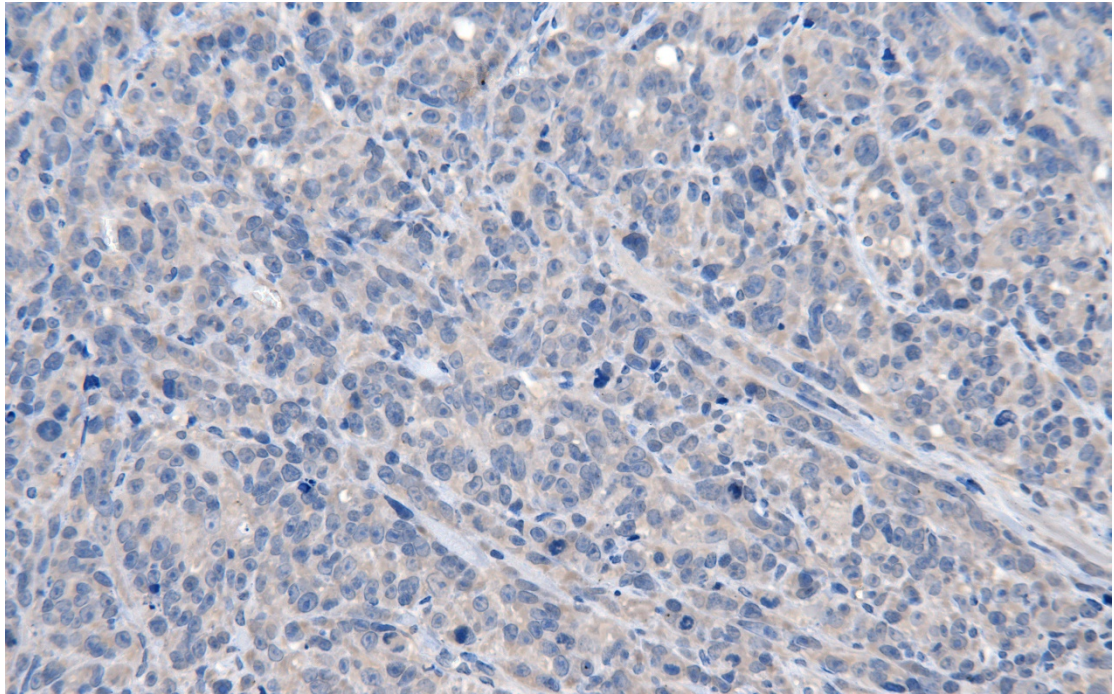

p-mTOR\_A4Control\_1

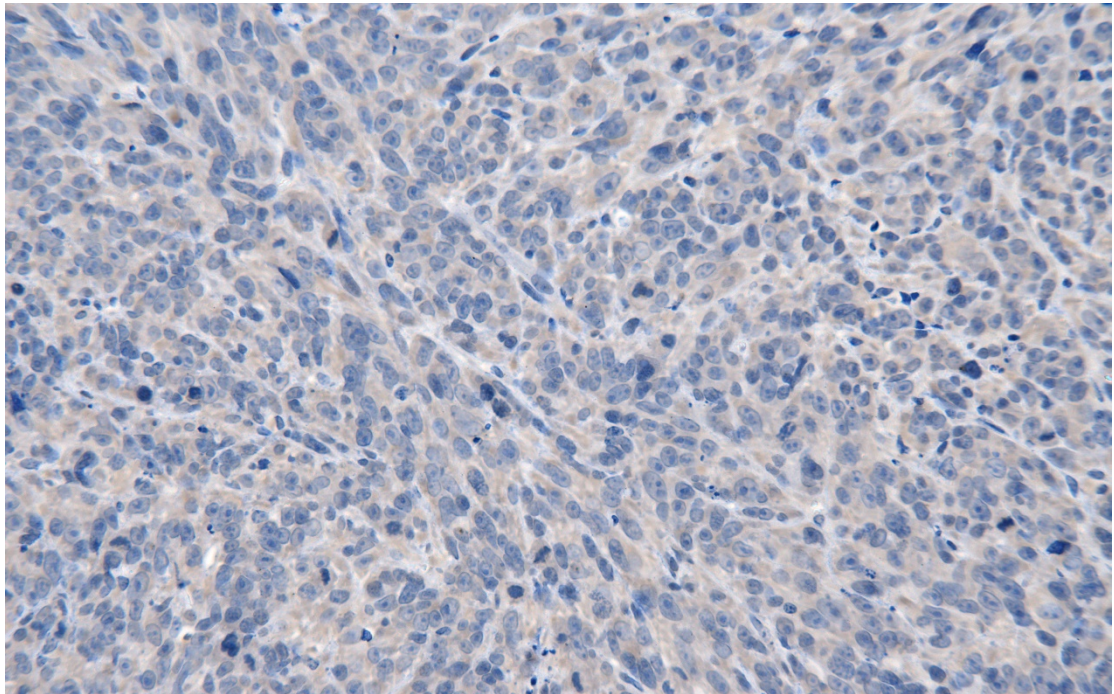

p-mTOR\_A4Control\_2

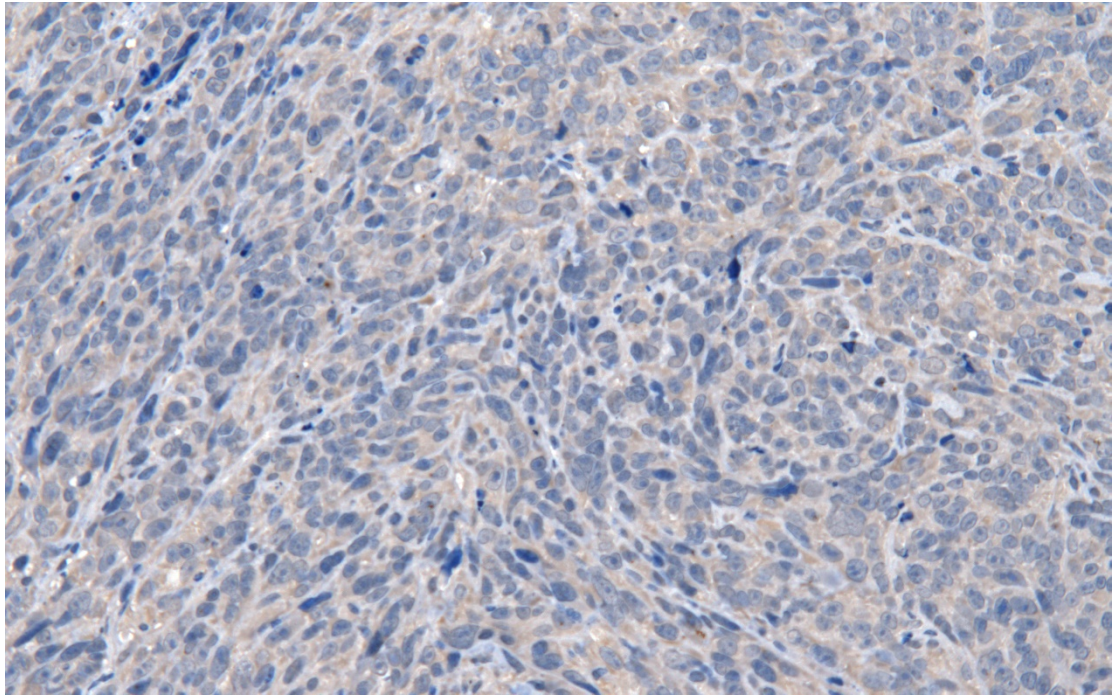

p-mTOR\_A4Control\_3

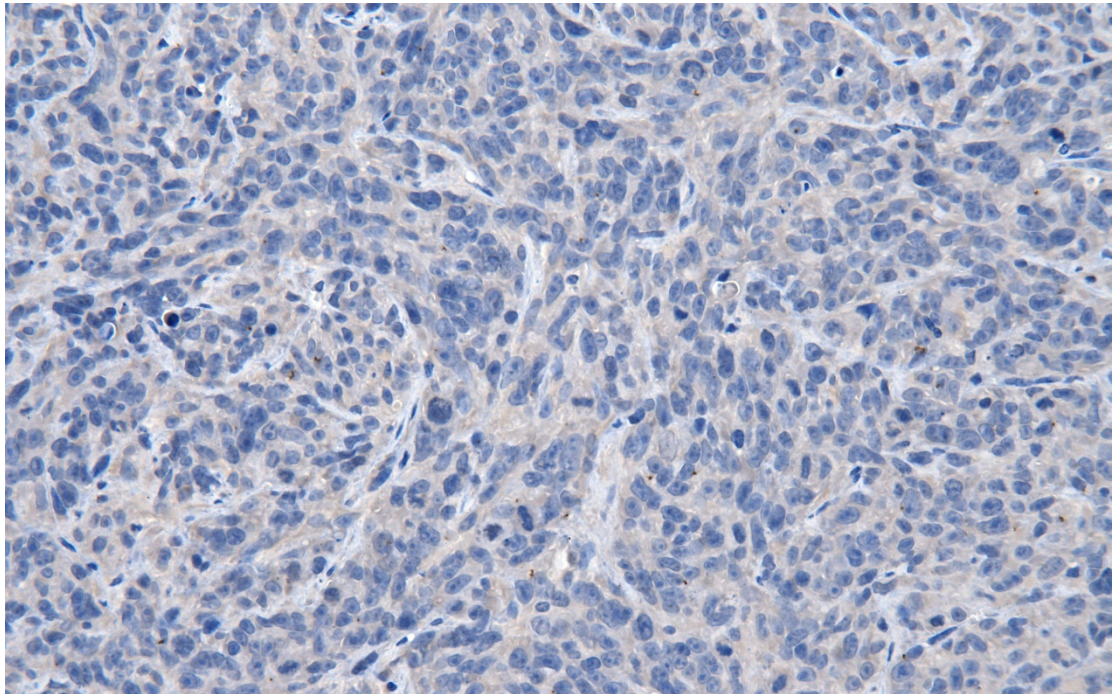

p-mTOR\_MNA4\_1

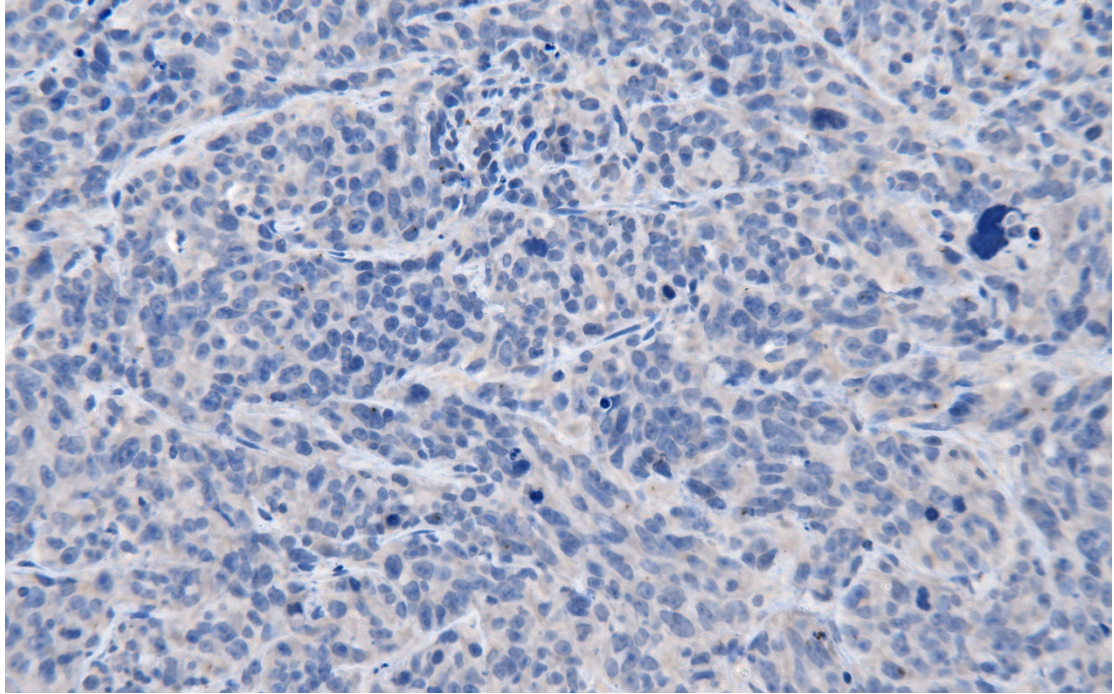

p-mTOR\_MNA4\_2

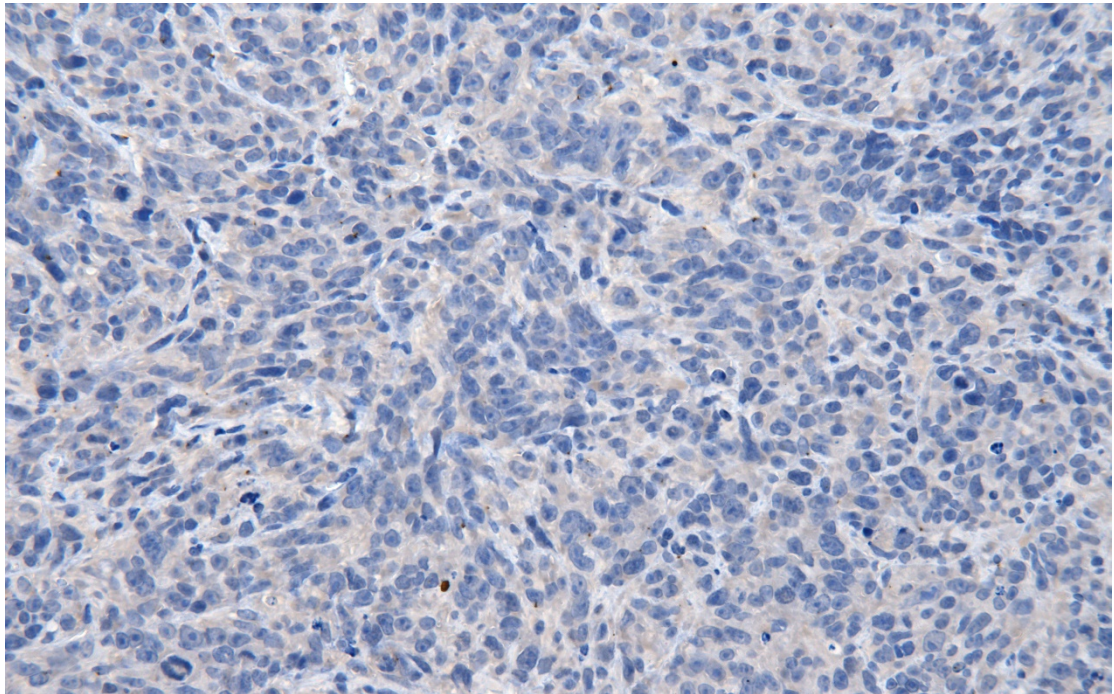

p-mTOR\_MNA4\_3

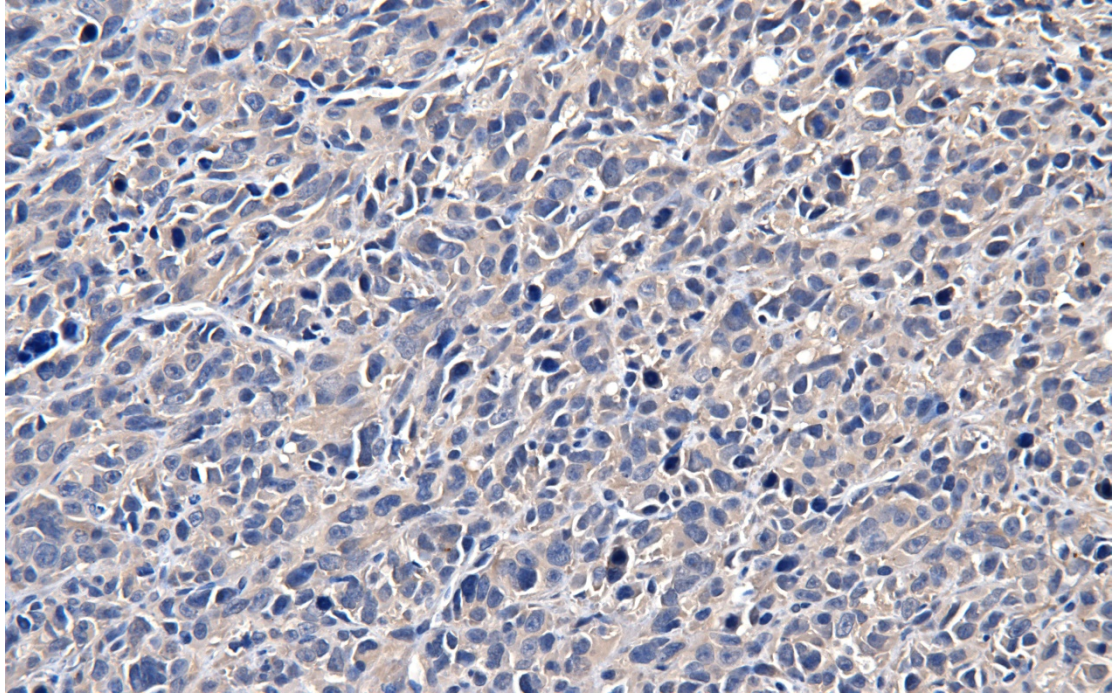

p-mTOR\_MNsiA4\_1

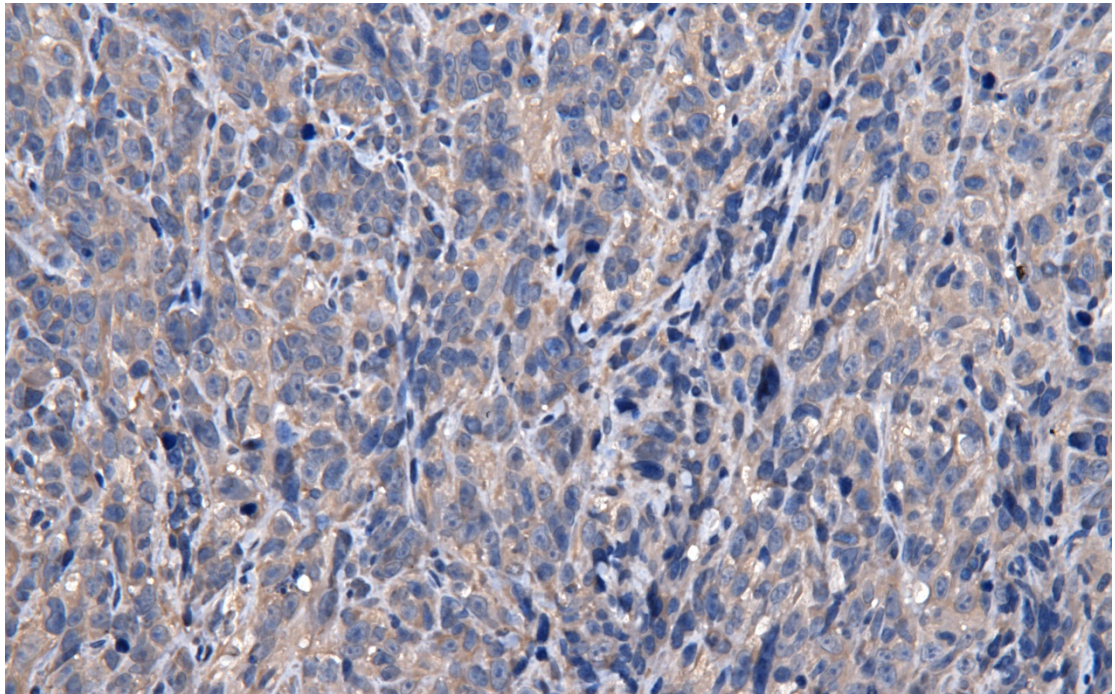

p-mTOR\_MNsiA4\_2

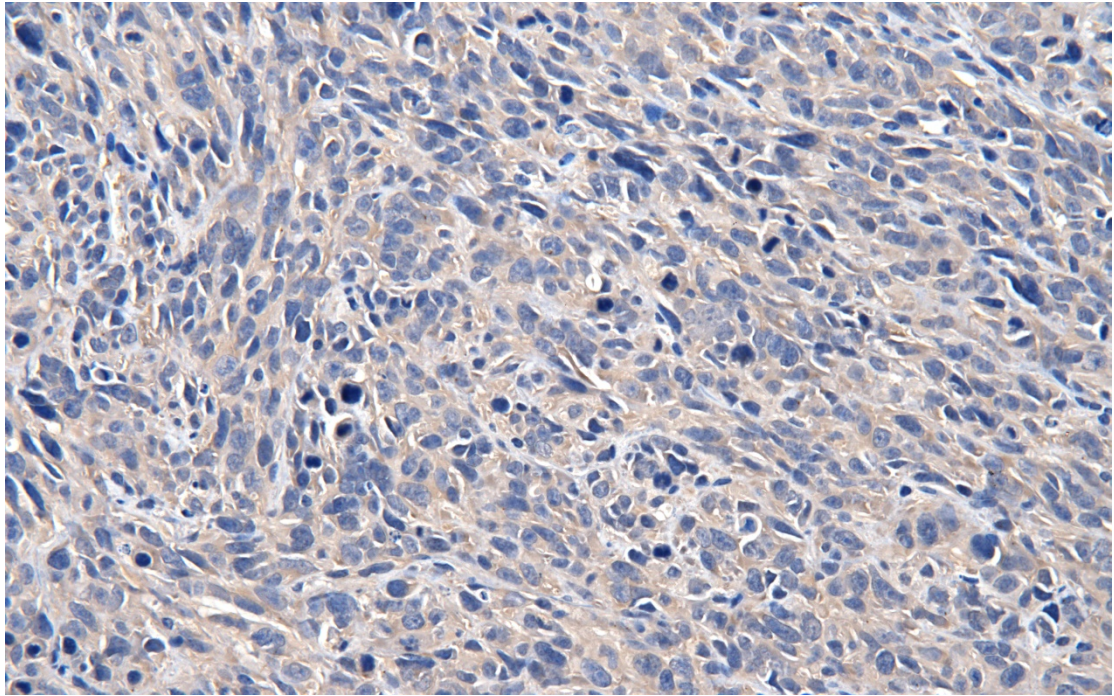

p-mTOR\_MNsiA4\_3

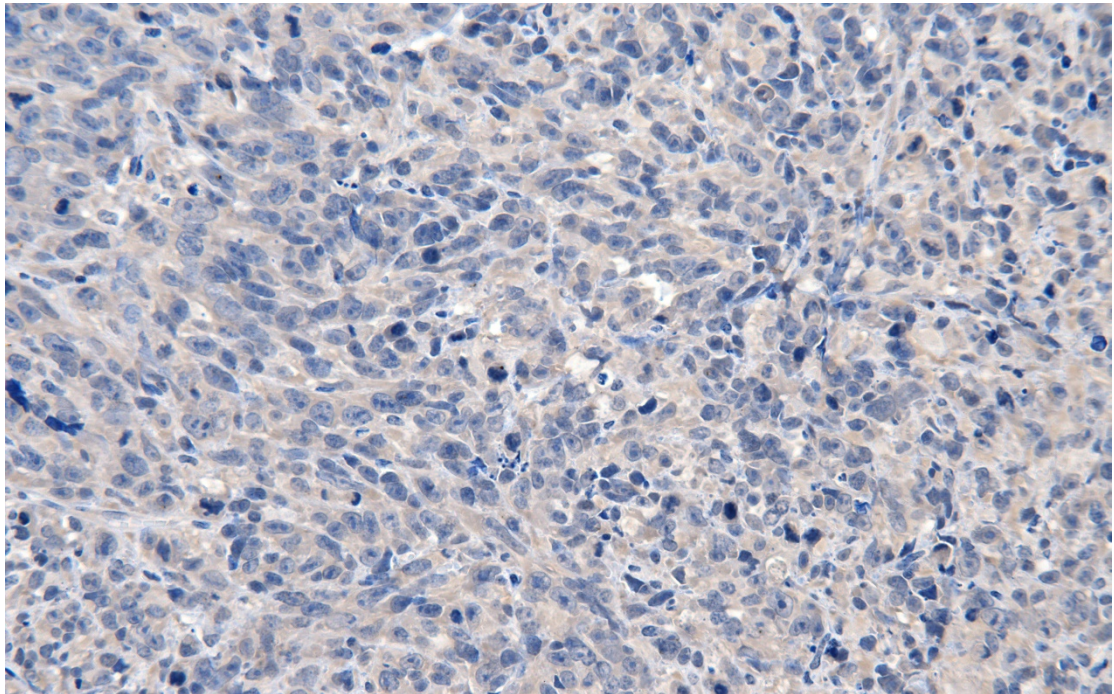

p-mTOR\_siControl\_1

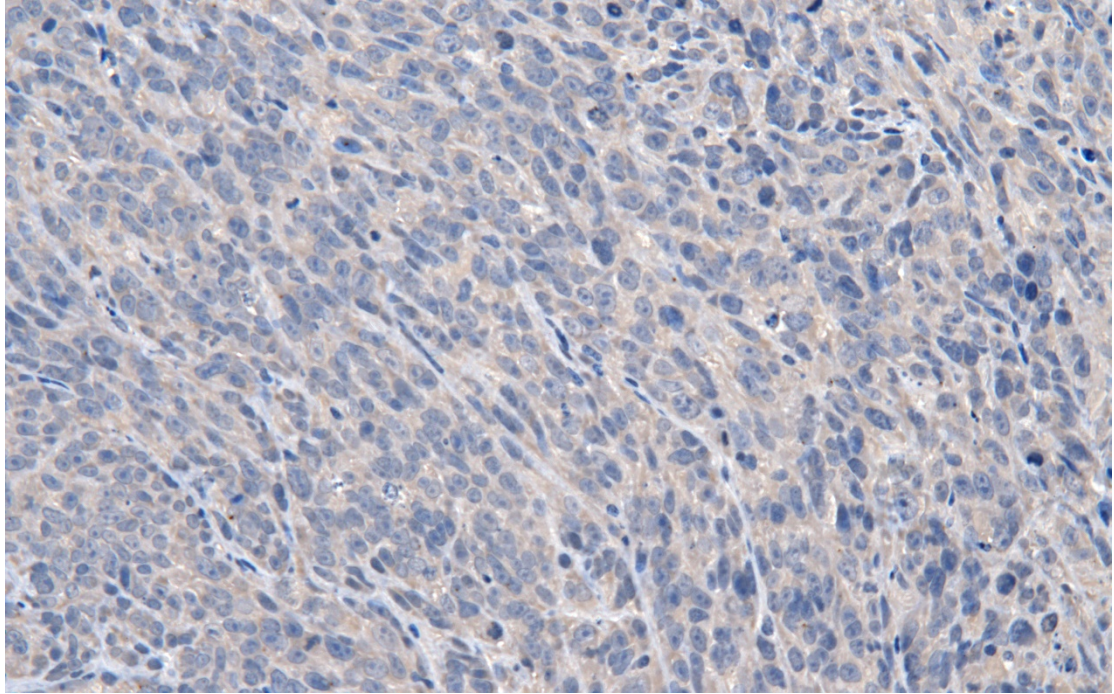

p-mTOR\_siControl\_2

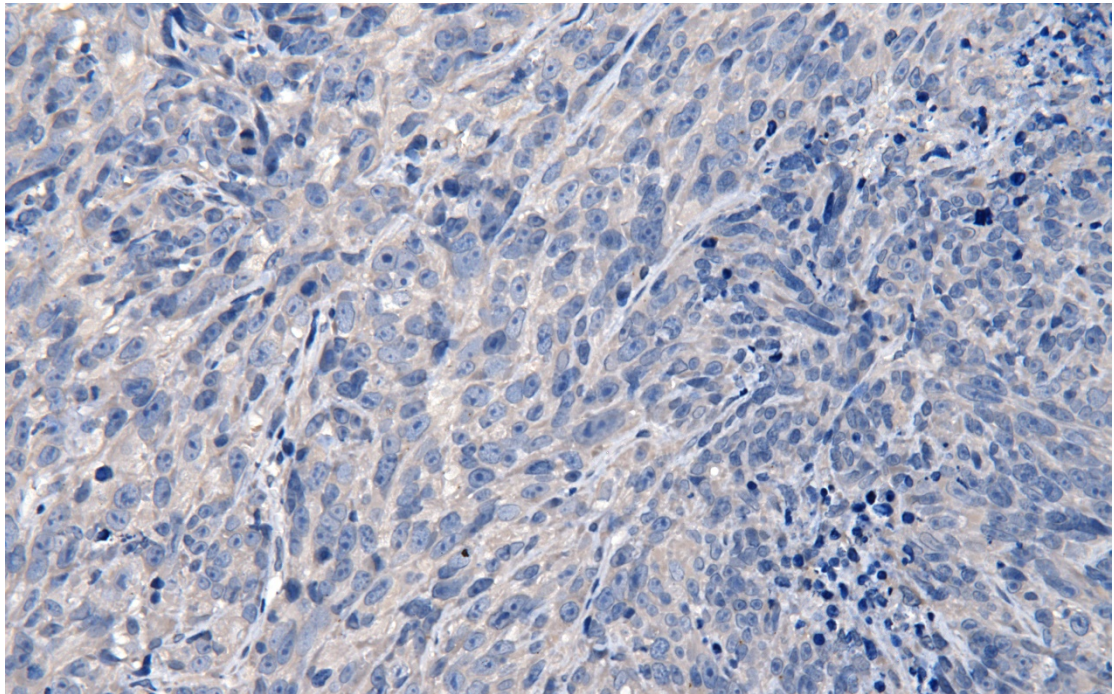

p-mTOR\_siControl\_3



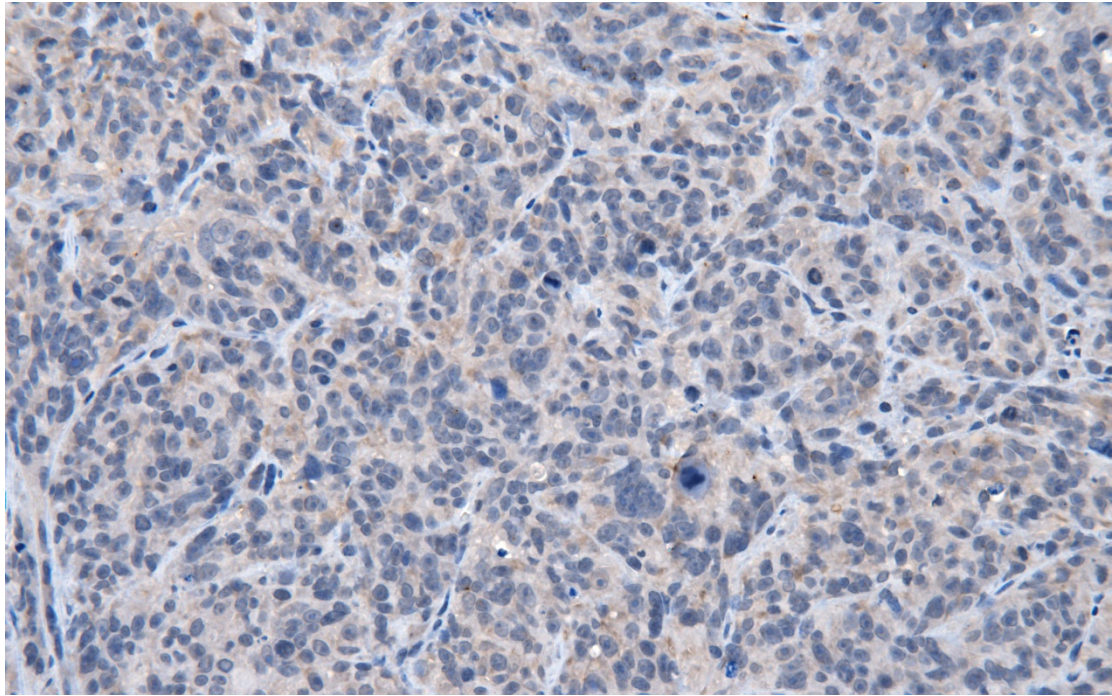

p-S6\_A4Control\_1

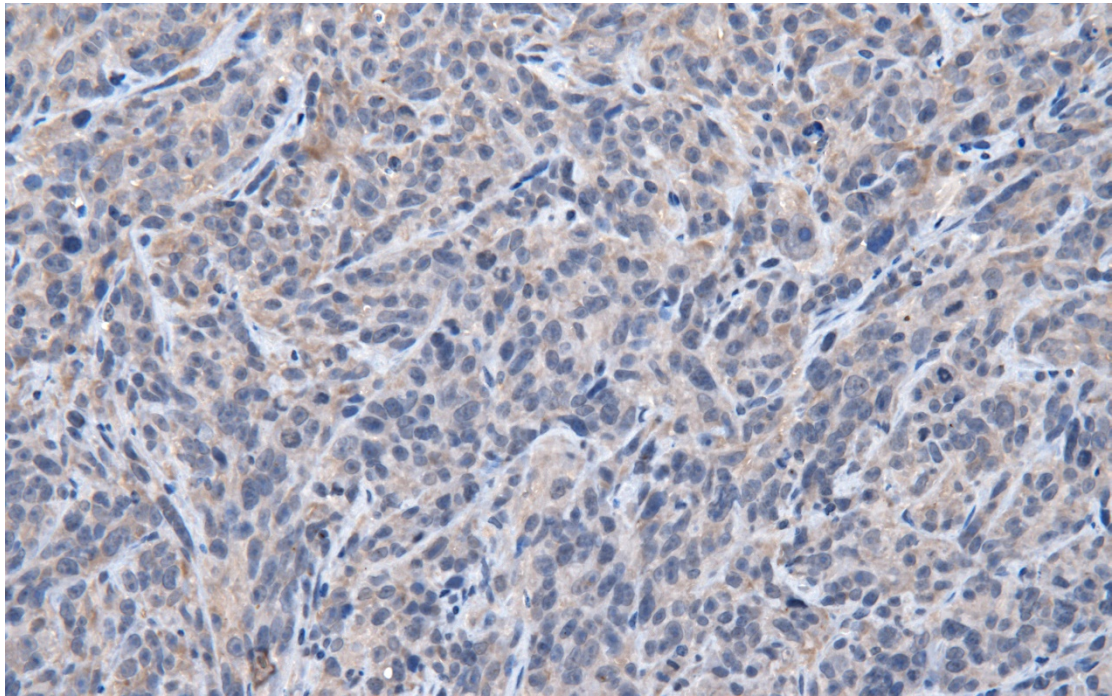

p-S6\_A4Control\_2

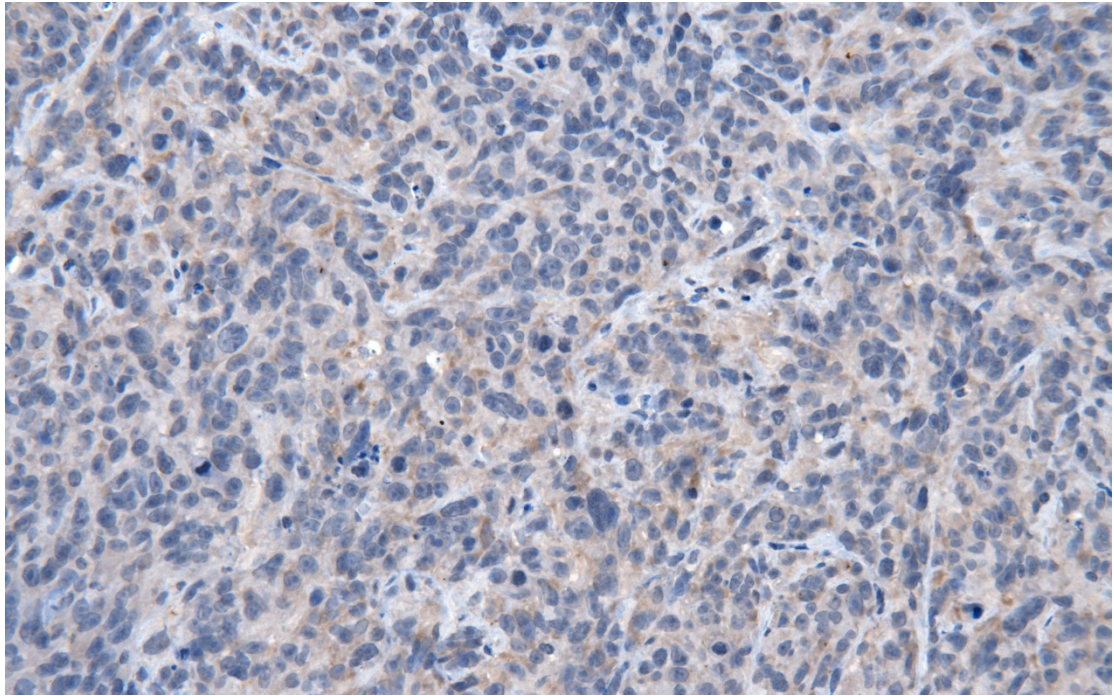

p-S6\_A4Control\_3

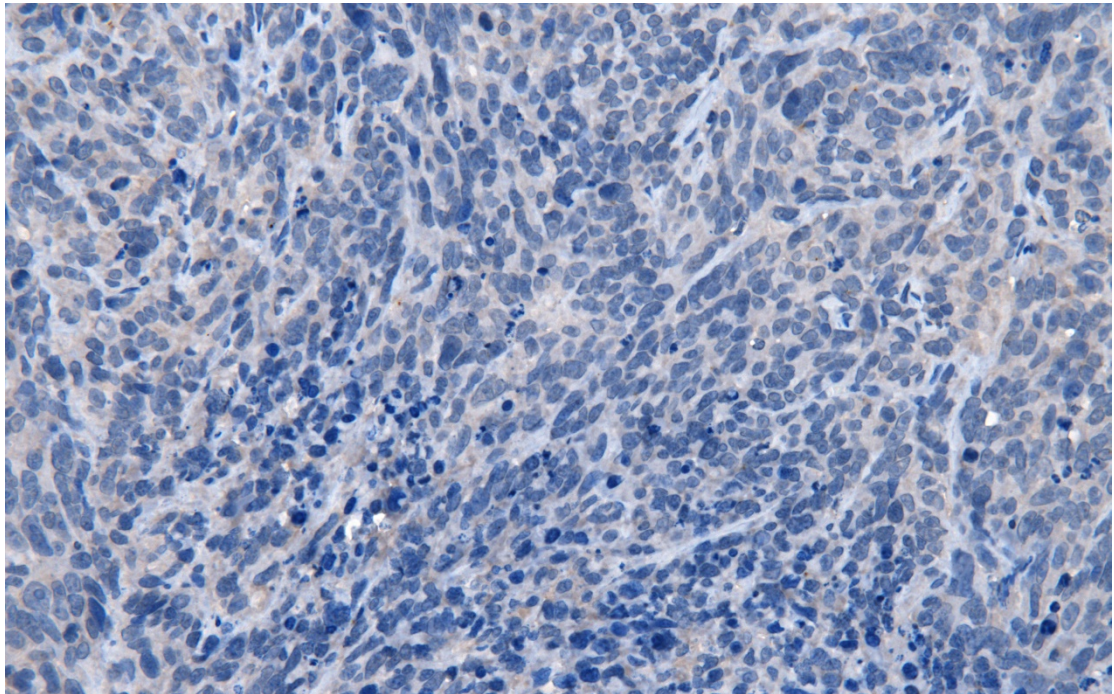

p-S6\_MNA4\_1

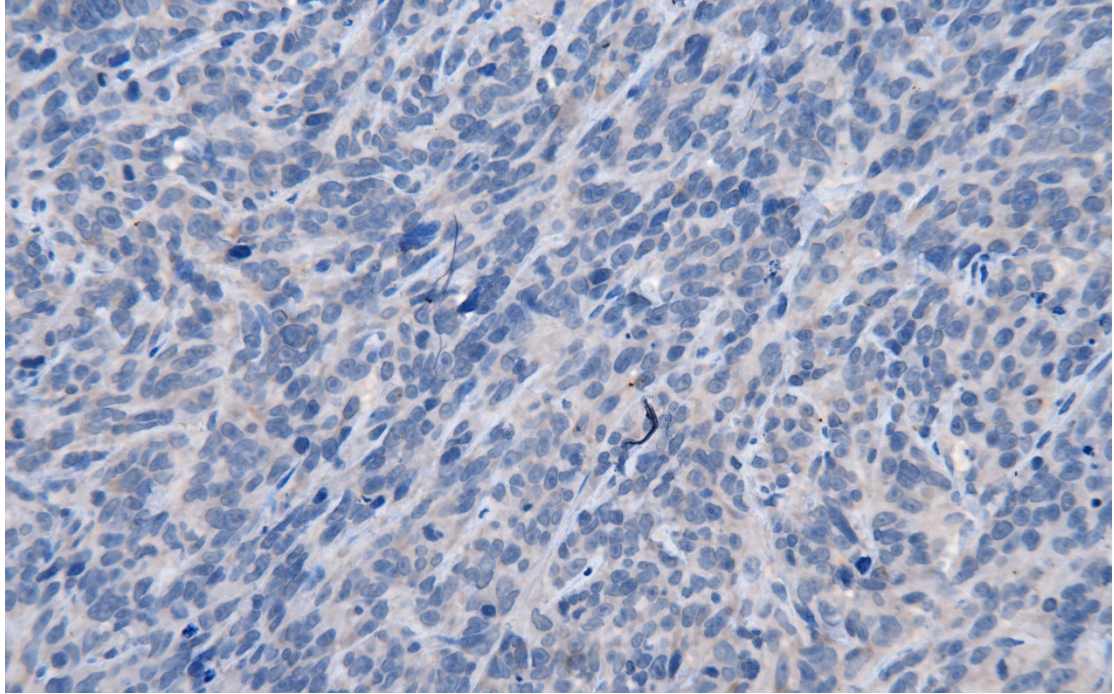

p-S6\_MNA4\_2

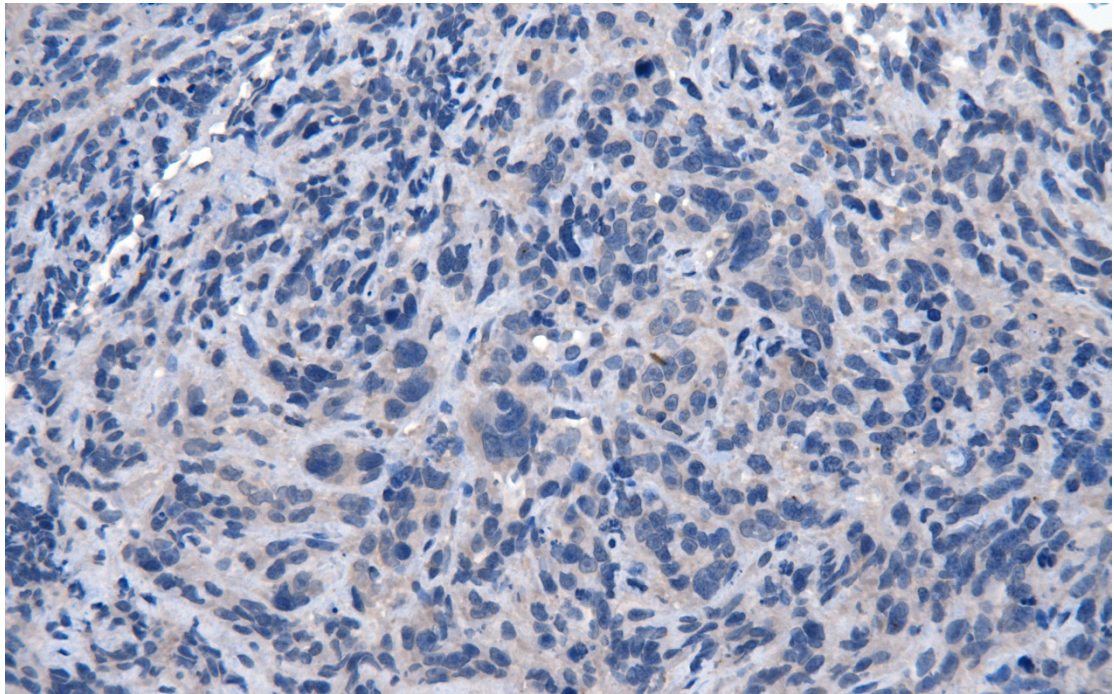

p-S6\_MNA4\_3

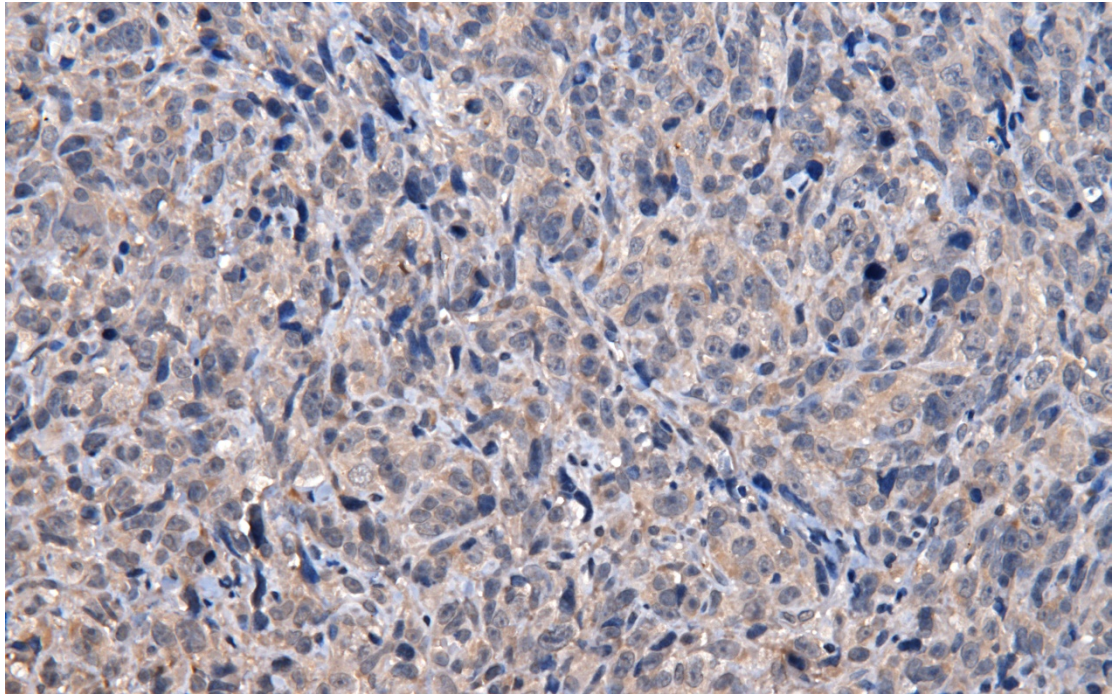

p-S6\_MNsiA4\_1

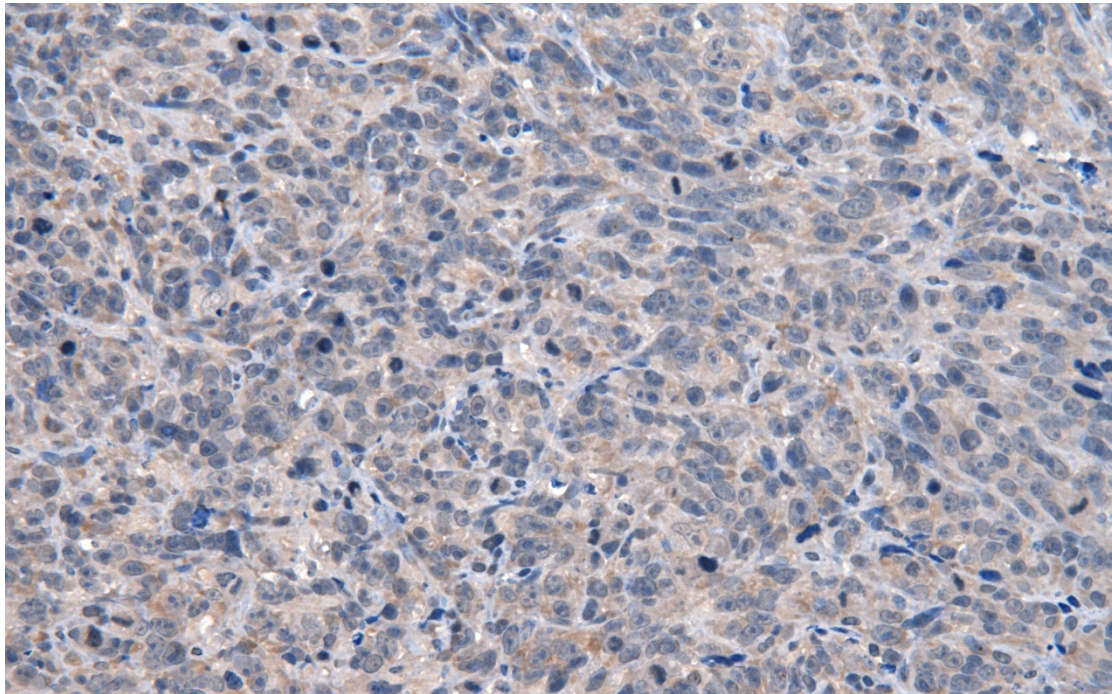

p-S6\_MNsiA4\_2

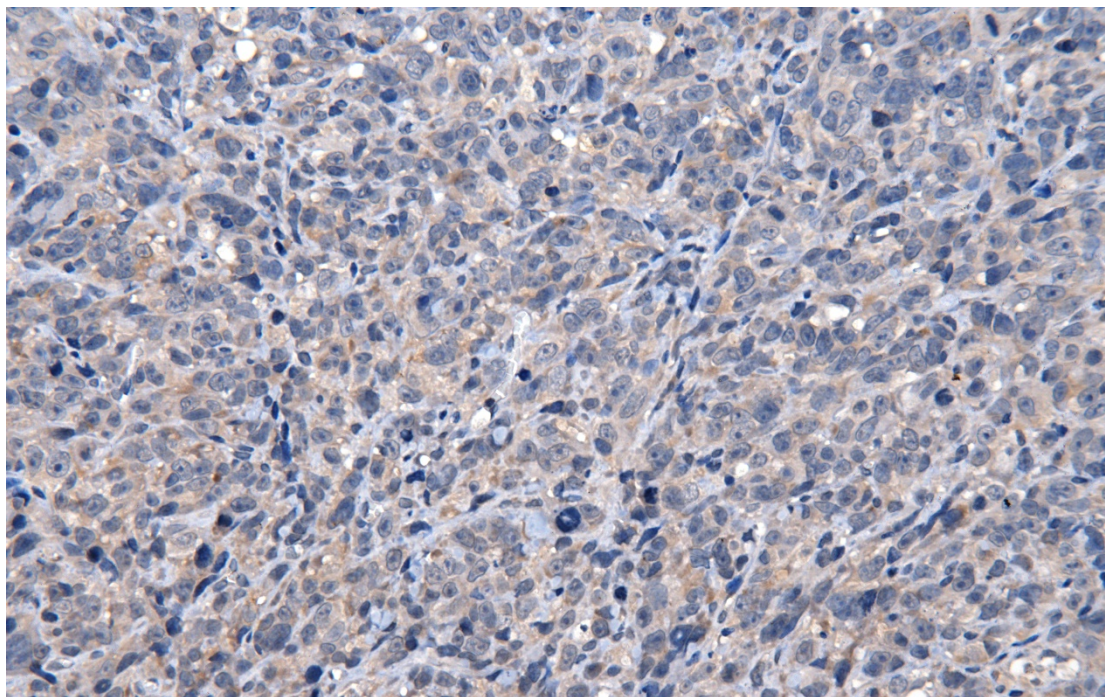

p-S6\_MNsiA4\_3

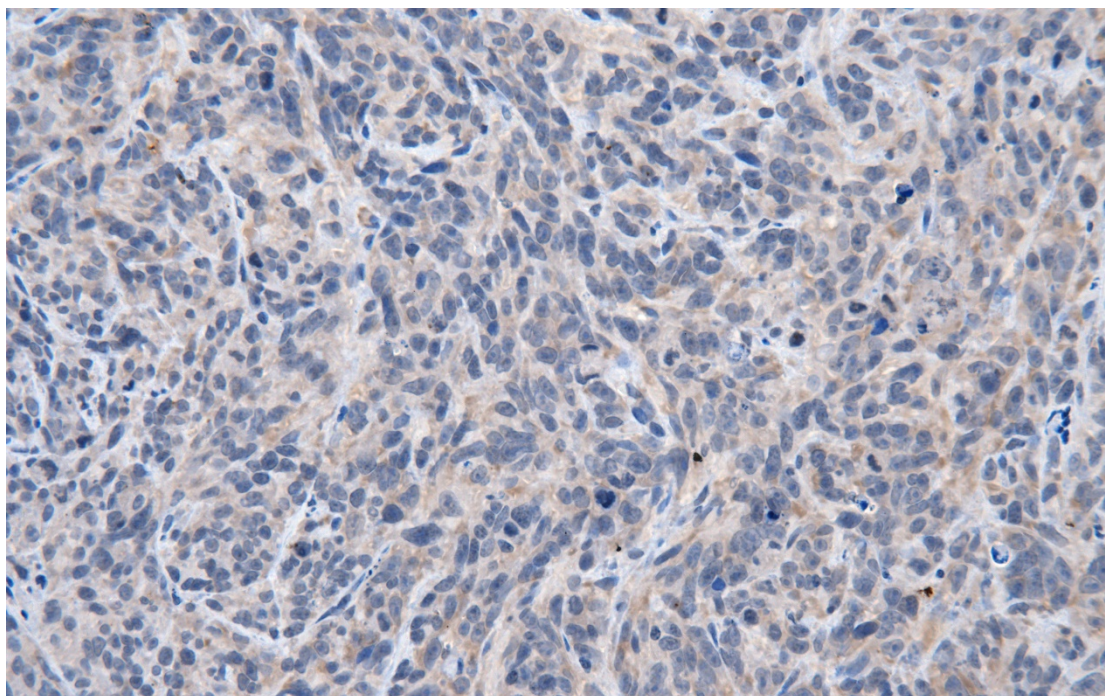

p-S6\_siControl\_1

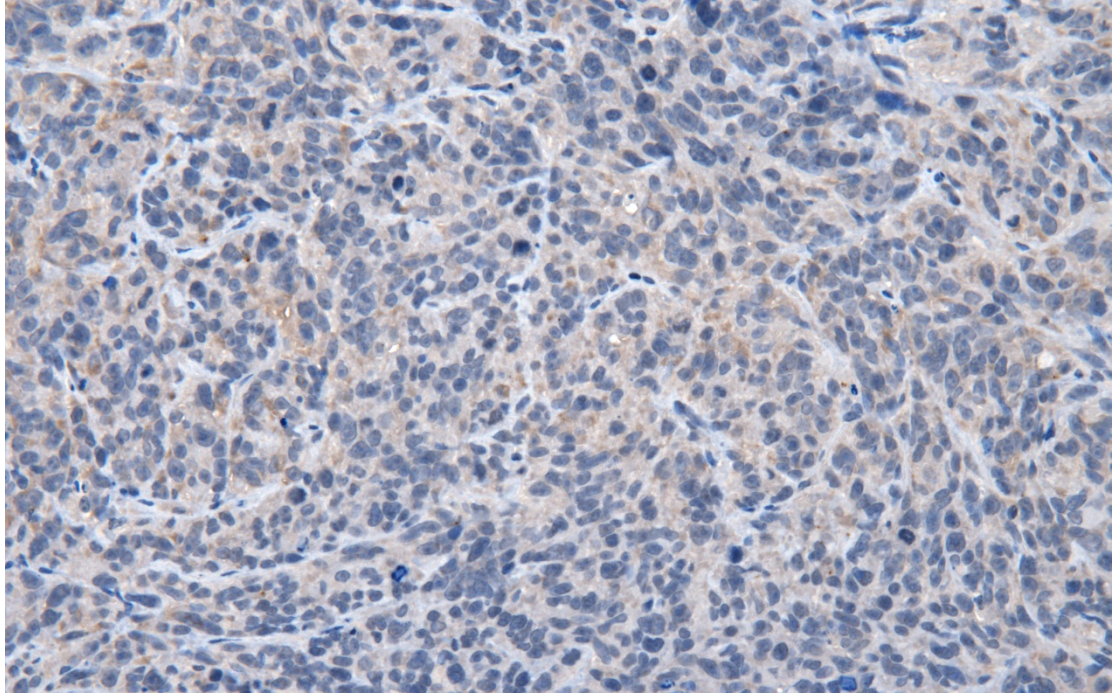

p-S6\_siControl\_2

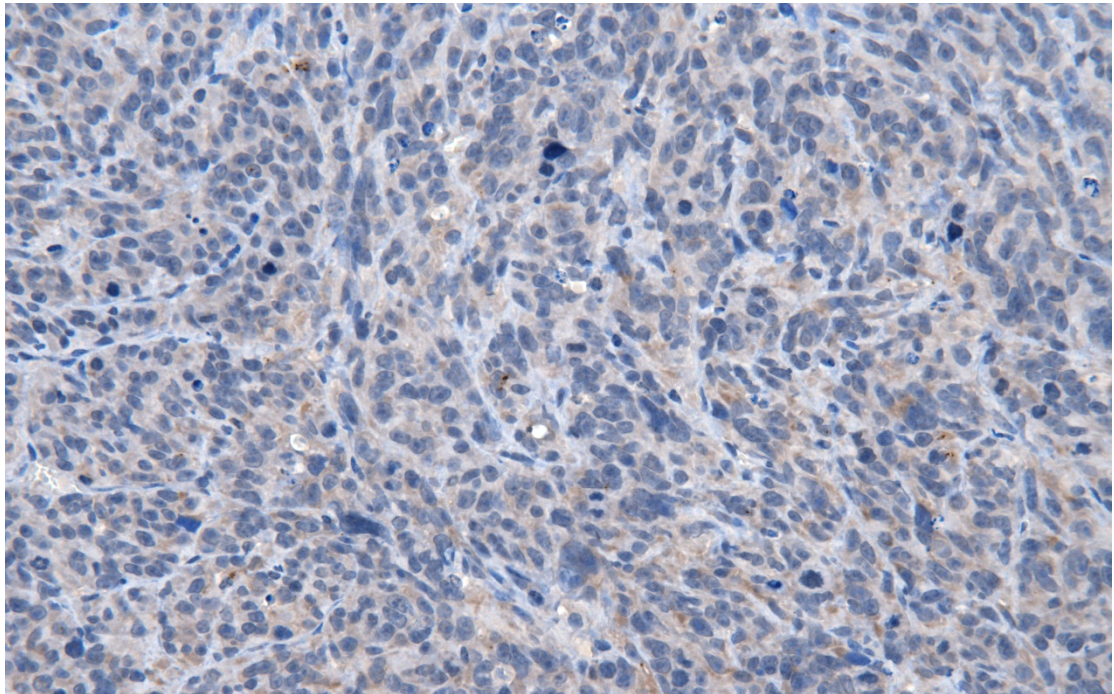

p-S6\_siControl\_3
